# Supplementary material
Source: PubMed Central journal article supplement (PMC11167723)

## Supporting Information

TITLE: Discovery and biological characterization of PRMT5:MEP50 protein:protein interaction inhibitors

AUTHORS: Andrew M. Asberry<sup>1,2,‡</sup>, Xinpei Cai<sup>3,‡</sup>, Xuehong Deng<sup>1,‡</sup>, Ulises Santiago<sup>4,‡</sup>, Sheng Liu<sup>5,6</sup>, Hunter S. Sims<sup>3</sup>, Weida Liang<sup>3</sup>, Xueyong Xu<sup>7</sup>, Jun Wan<sup>5,6,8</sup>, Wen Jiang<sup>7,9</sup>, Carlos J. Camacho<sup>4\*</sup>, Mingji Dai<sup>3,9,10\*</sup>, and Chang-Deng Hu<sup>1,9\*†</sup>

### AFFILIATIONS

<sup>1</sup> Department of Medicinal Chemistry and Molecular Pharmacology, Purdue University, West Lafayette, IN, 47907, USA.

<sup>2</sup> Purdue University Interdisciplinary Life Sciences Graduate Program, Purdue University, West Lafayette, IN, 47907, USA.

<sup>3</sup> Department of Chemistry, Purdue University, West Lafayette, IN, 47907, USA

<sup>4</sup> Department of Computational and Systems Biology, University of Pittsburgh, Pittsburgh, PA, 15260, USA

<sup>5</sup> Department of Medical and Molecular Genetics, Indiana University School of Medicine, Indianapolis, IN, 46202, USA.

<sup>6</sup> The Indiana University Melvin and Bren Simon Cancer Center, Indiana University, Indianapolis, IN, 46202, USA.

<sup>7</sup> Department of Biological Sciences, Purdue University, 240 S Martin Jischke Drive, West Lafayette, IN 47907, USA

<sup>8</sup> The Center for Computational Biology and Bioinformatics, Indiana University School of Medicine, Indianapolis, IN, 46202, USA.

<sup>9</sup> Purdue University Center for Cancer Research, Purdue University, West Lafayette, IN, 47907, USA.

<sup>10</sup> Department of Chemistry, Emory University, Atlanta, GA, 30322, USA.

‡ Authors contributed equally to this work

† Deceased on September 1, 2022

### EMAIL ADDRESS

Chang-Deng Hu, MD, Ph.D.: [hu1@purdue.edu](mailto:hu1@purdue.edu)

Mingji Dai, Ph.D.: [mingji.dai@emory.edu](mailto:mingji.dai@emory.edu)

Carlos Camacho, Ph.D.: [ccamacho@pitt.edu](mailto:ccamacho@pitt.edu)

### CONTENTS OF SUPPORTING INFORMATION:

Supporting Information.pdf: Fig. S1-S6 and compound identity and purity (NMR/HPLC)

SI\_Spreadsheet.xlsx: Biological reagents used

SI\_SMILES.csv: Compound SMILES format and biological data

4gqb.MP8.pdb: Molecular docking 3D model

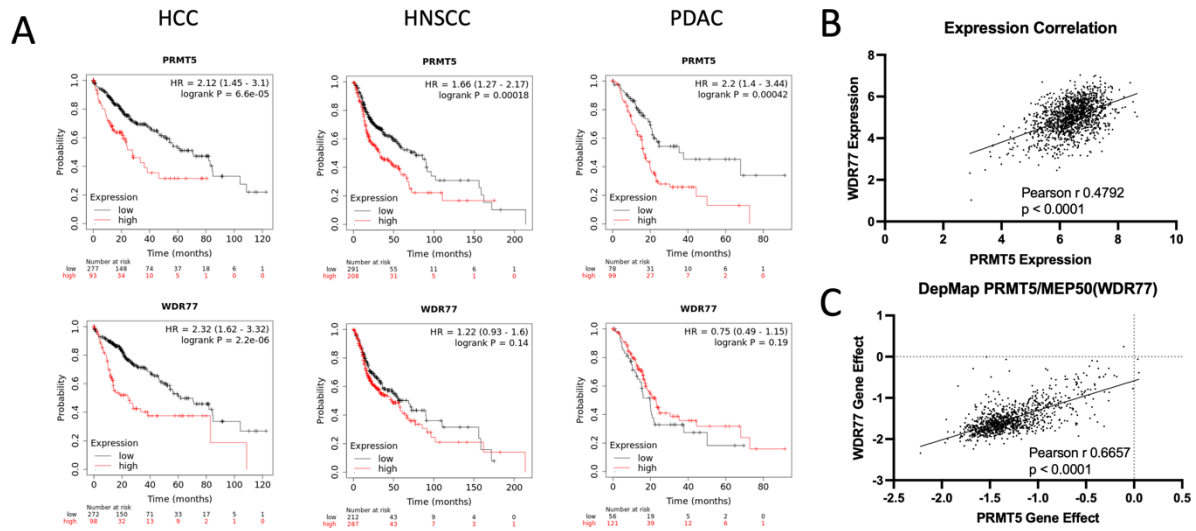

**Figure S1. PRMT5 and MEP50 Expression is Positively Correlated and Indicates Poor Prognosis.** (A) Overall survival curve based on high/low stratified PRMT5 (top row) and MEP50/WDR77 (bottom row) expression in hepatocellular carcinoma (HCC), head/neck squamous cell carcinoma (HNSCC), and pancreatic ductal adenocarcinoma (PDAC) from GEO/EGA/TCGA database (B) Expression correlation of PRMT5 and MEP50/WDR77 in >1300 cell lines (Broad Institute) (C) Gene Dependency (lethality of gene loss) correlation between PRMT5 and MEP50/WDR77 genes in >1300 cell lines (Broad Institute)

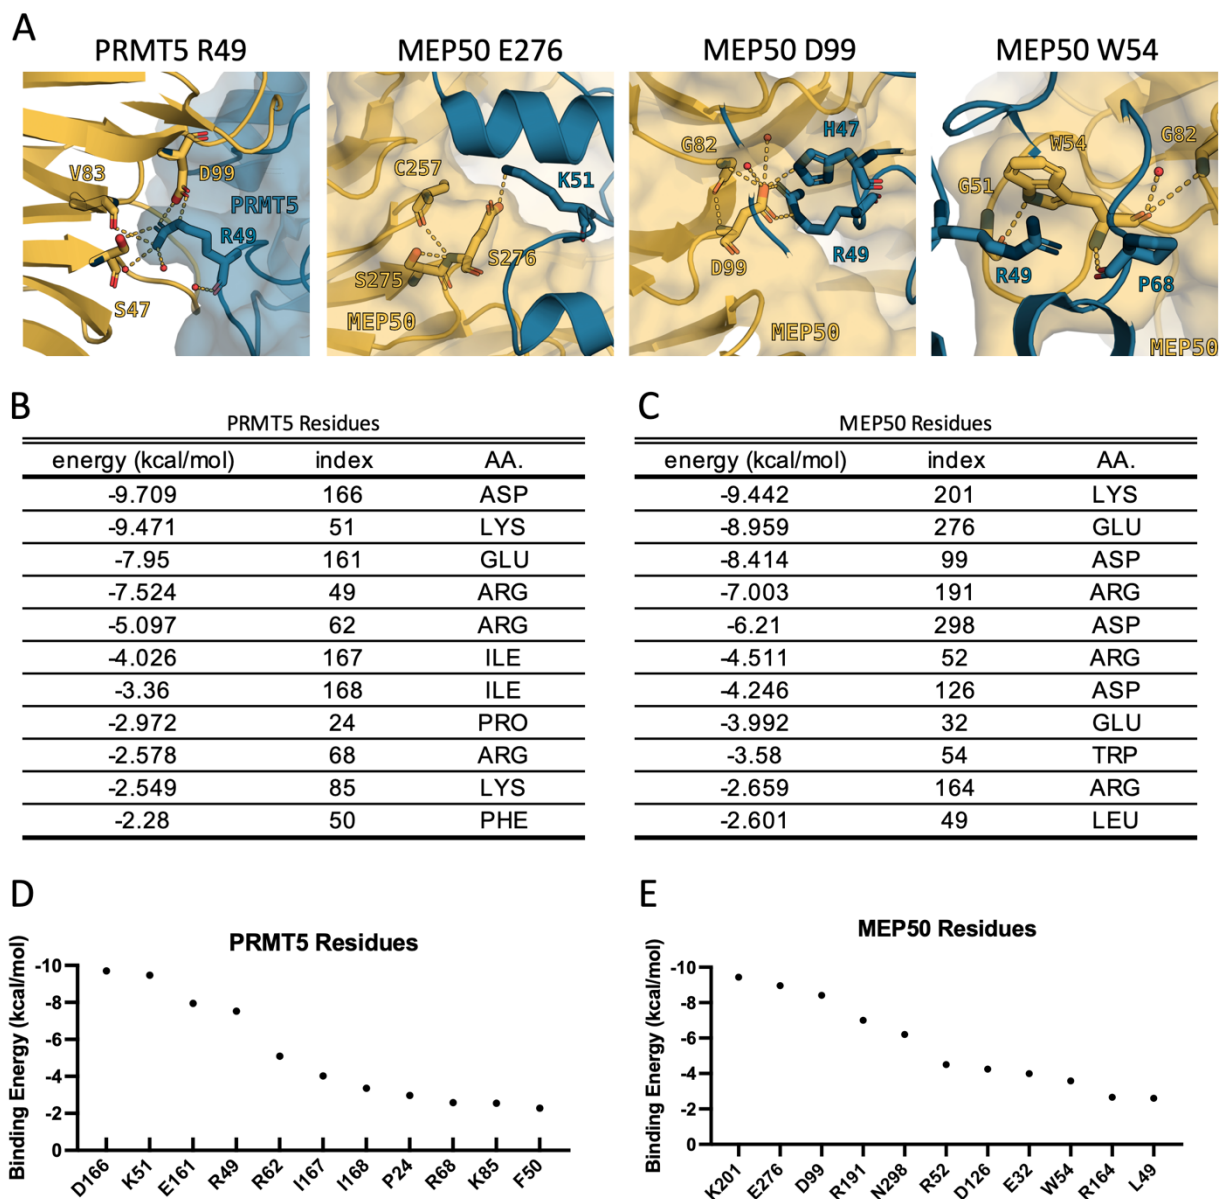

**Figure S2. PRMT5 and MEP50 Electrostatic Interactions and Binding Energy.** (A) All  $\leq 4$  angstrom contacts for residues PRMT5 R49 (left), MEP50 E276 (middle left), MEP50 D99 (middle right), and MEP50 W54 (right). Waters in crystal structure 4GQB shown as red spheres. (B,C) Predicted binding energy for top 11 residues mediating PRMT5:MEP50 protein:protein interaction for PRMT5 (B) and MEP50 (C). (D,E) Graphical portrayal ranked order for binding energy listed in (B,C).

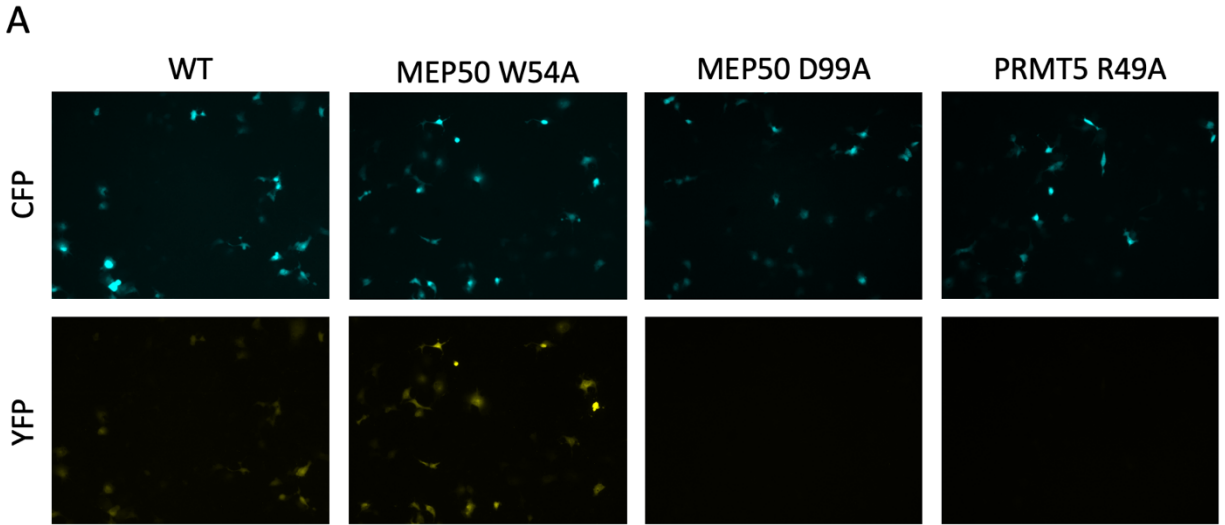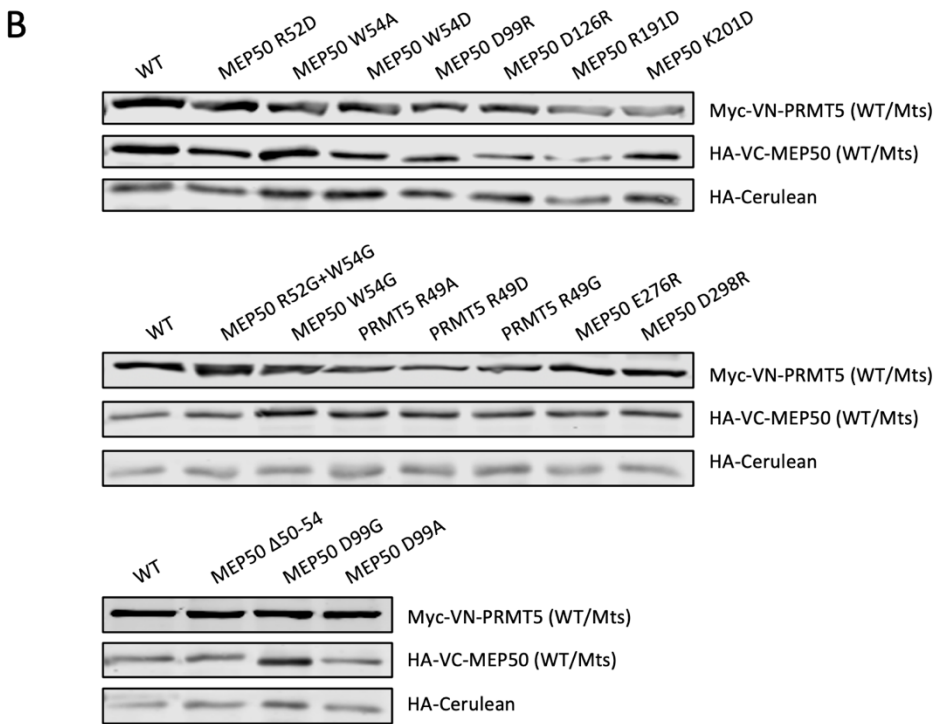

**Figure S3. PRMT5 and MEP50 Mutants in BiFC Screen.** (A) Representative Cerulean fluorescent protein (CFP) and Venus / Yellow fluorescent protein (YFP) images from BiFC mutant interaction experiment acquired at 10X magnification. (B) Western blots showing Myc-tagged PRMT5(TIM) (Myc-VN-PRMT5) wild type (WT) or Mutants (Mts), HA-tagged MEP50 (HA-VC-MEP50) wild type (WT) or mutants (Mts), HA-tagged Cerulean (HA-Cerulean) fusion protein expression via western blot



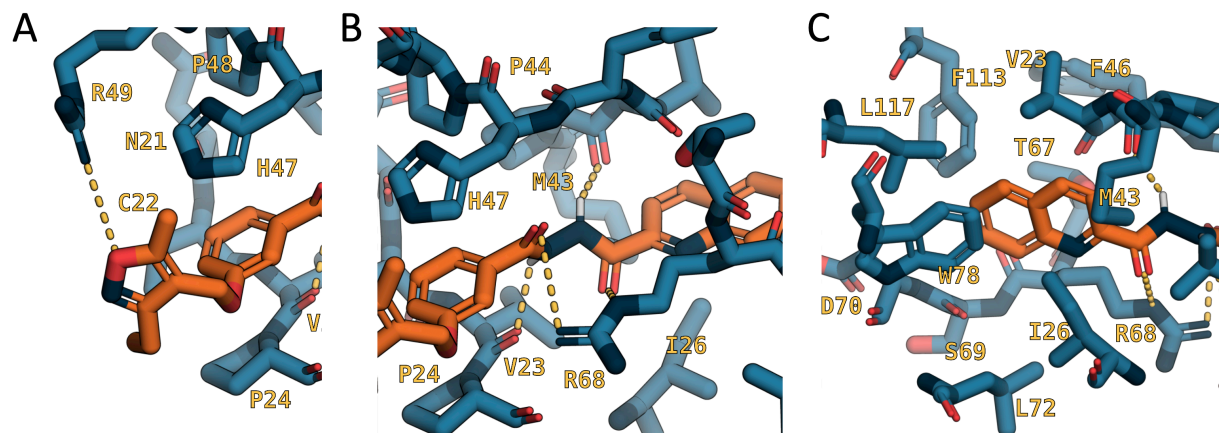

**Figure S4. Detailed Predicted Binding Mode of Compound 17.** (A) Orientation and interaction of isoxazole ring with PRMT5 R49. (B) Orientation and interactions of linker with PRMT5 M43, V23, and R68. (C) Orientation of quinoline ring in pocket of PRMT5.

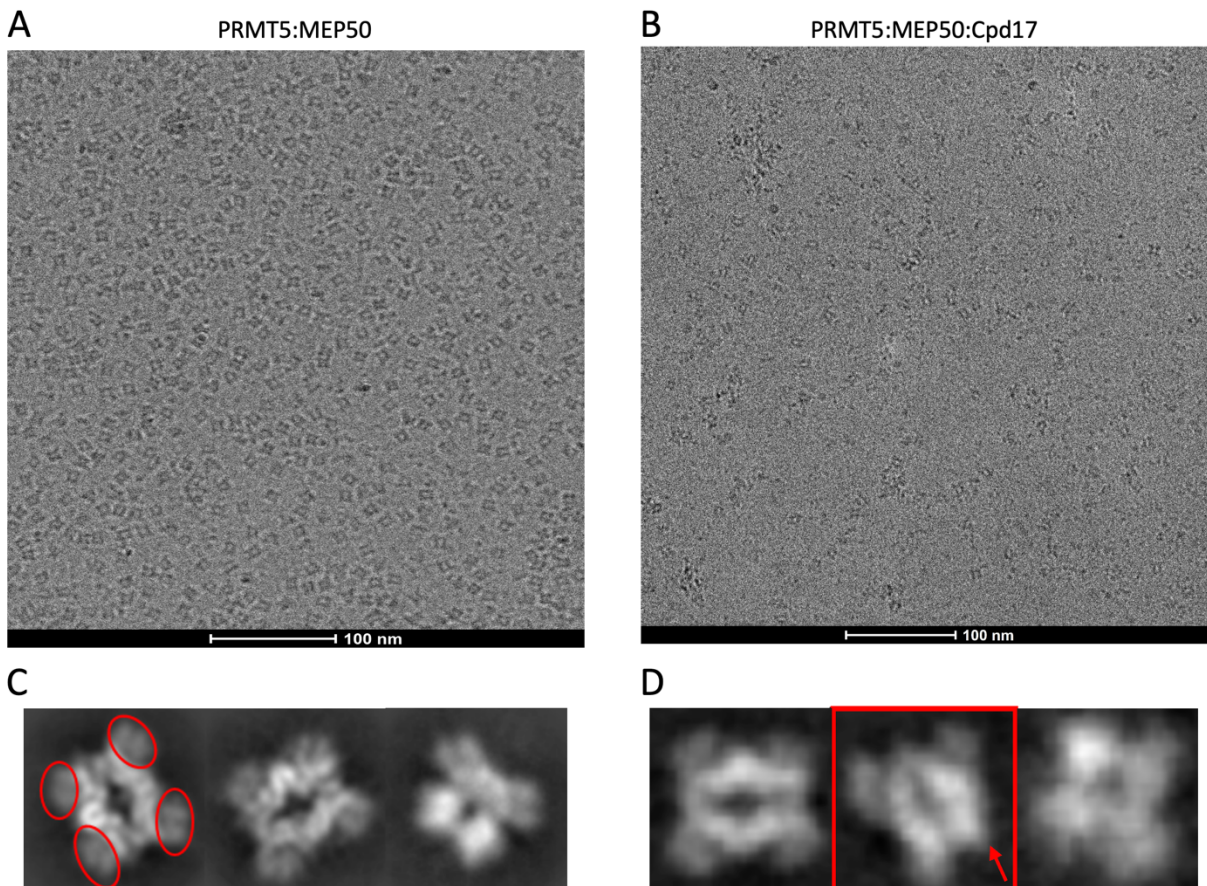

**Figure S5. Cryo-EM micrograph indicates Compound 17 displaces MEP50 subunit(s).** (A, B) Representative cryo-EM micrograph of PRMT5/MEP50 and PRMT5/MEP50/Cpd **17**, respectively. Scale bars, 100 nm. (C, D) 2D class averages of PRMT5/MEP50 and PRMT5/MEP50/Cpd **17**, respectively. Four copies of MEP50 represented in red circles in (C) decorate the outer surface of the molecule. Smaller particles and aggregates can be observed in (B). 2D class average highlighted in red square in (D) suggests one MEP50 is displaced (indicated by red arrow) in the presence of Cpd **17**.

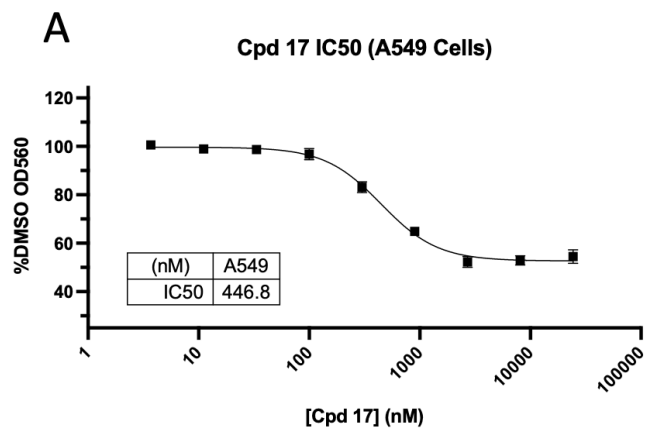

**Figure S6. Compound 17 IC<sub>50</sub> in A549 cancer cell line.** (A) IC<sub>50</sub> Curve for A549 (non-small cell lung cancer (NSCLC)) cell line treated with Cpd **17** for 72 h.

# NMR Spectra

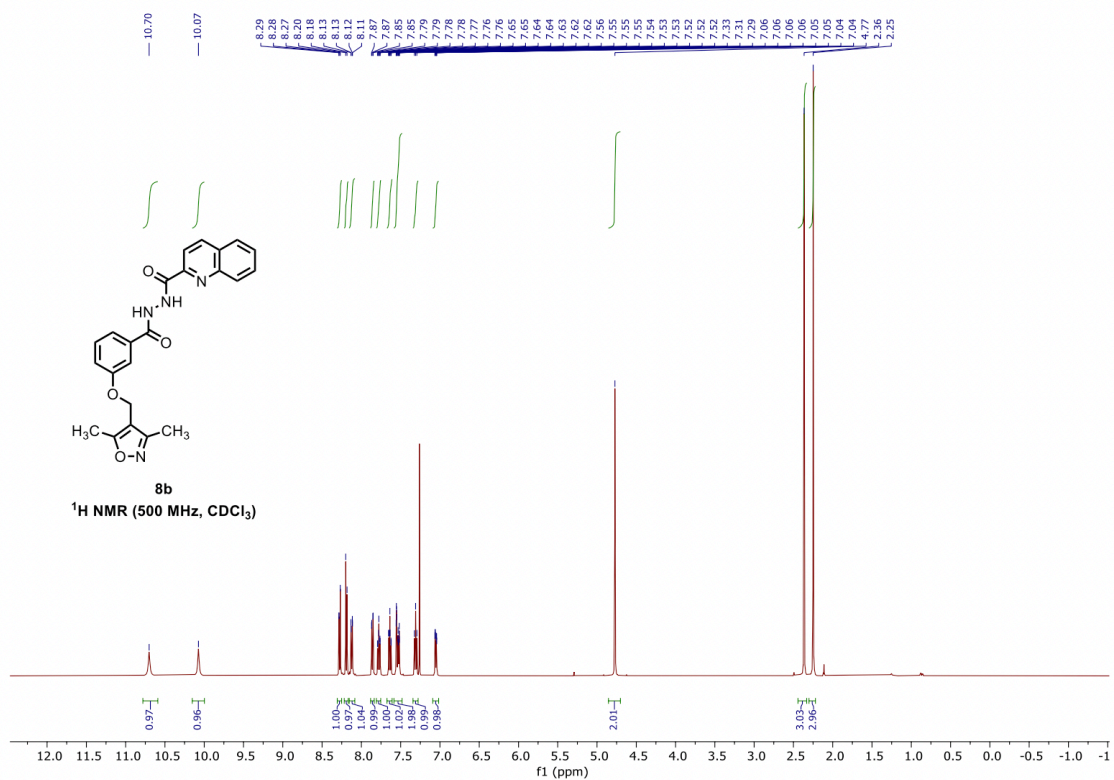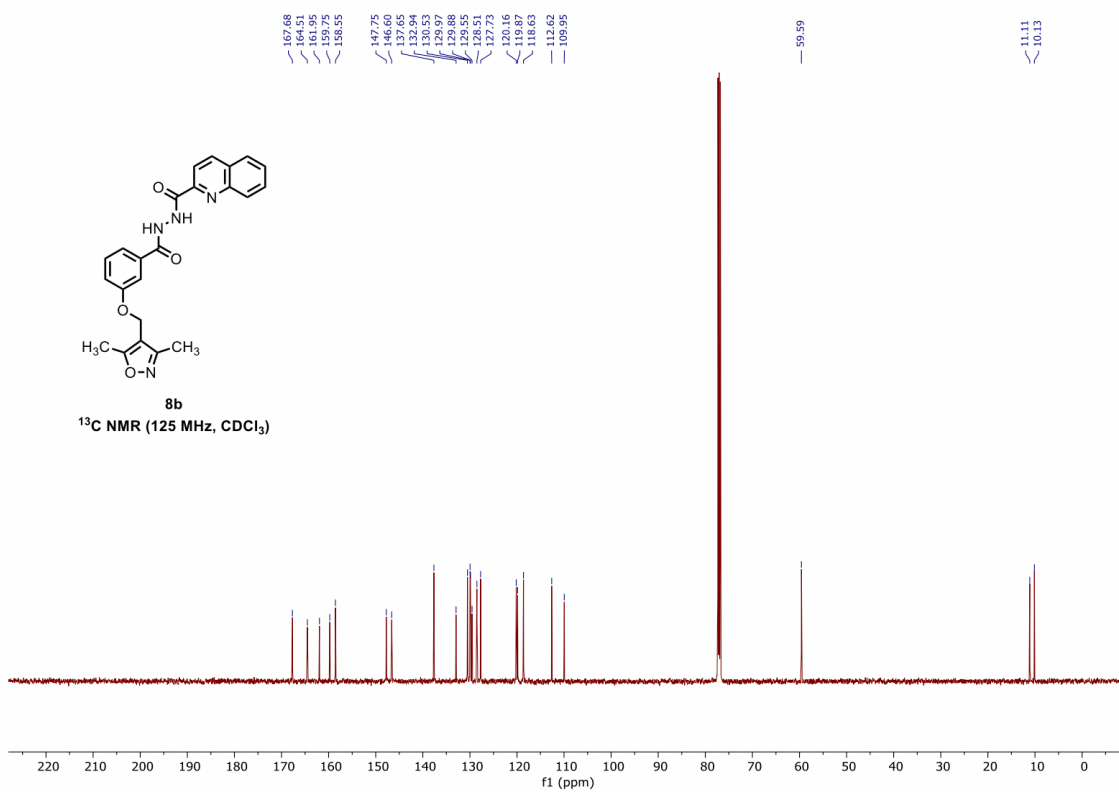

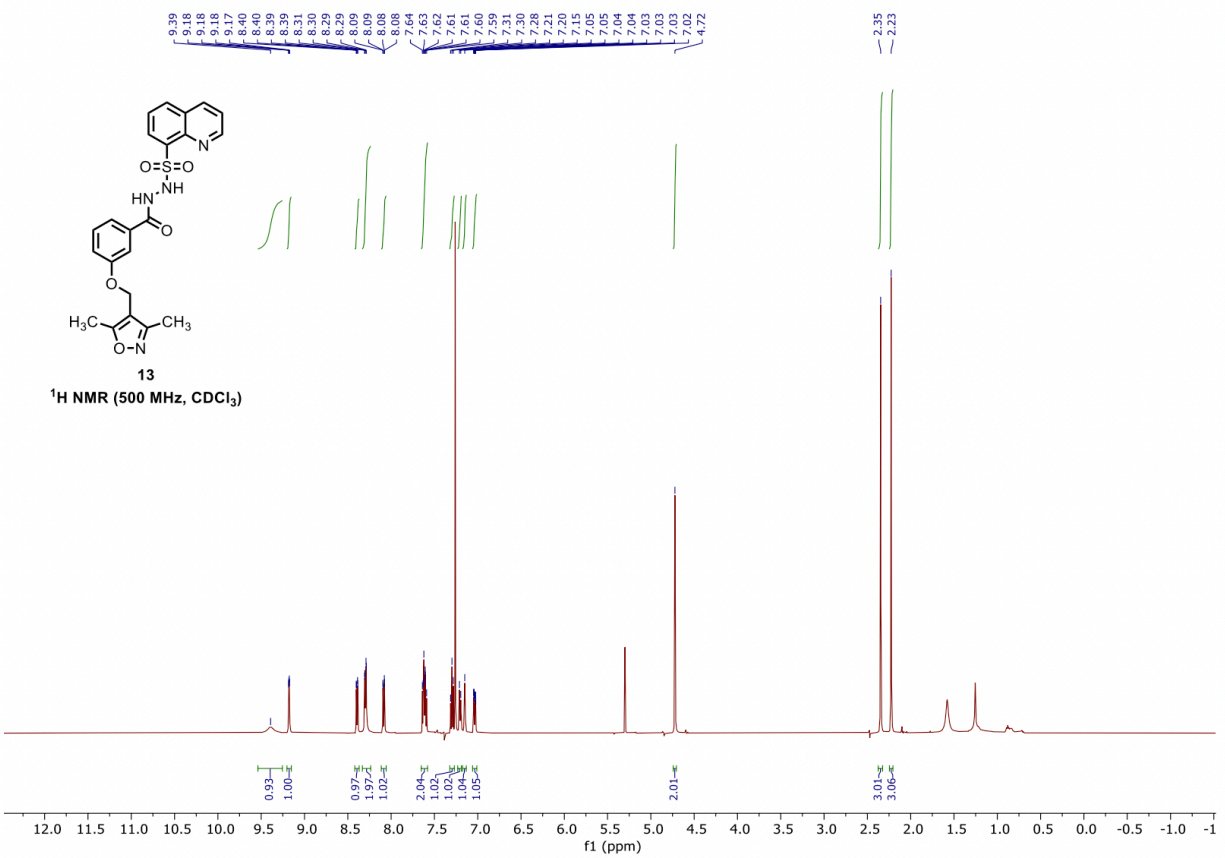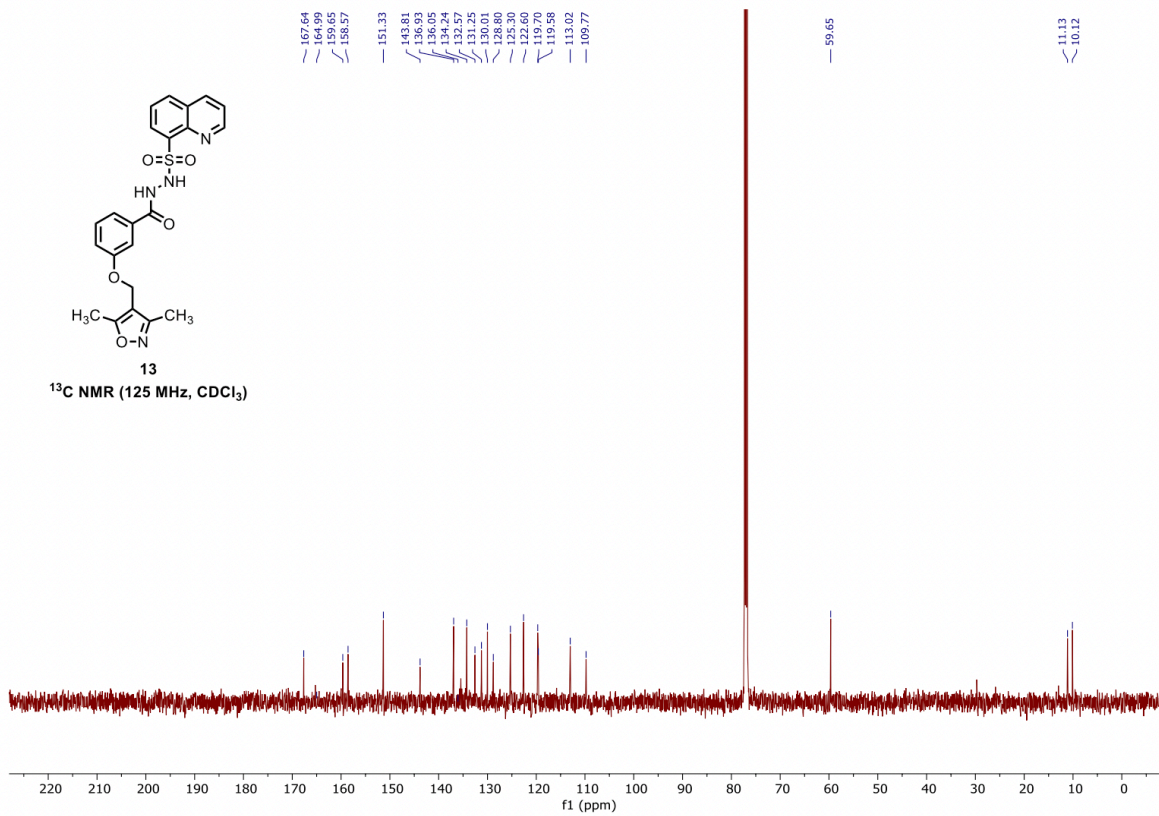

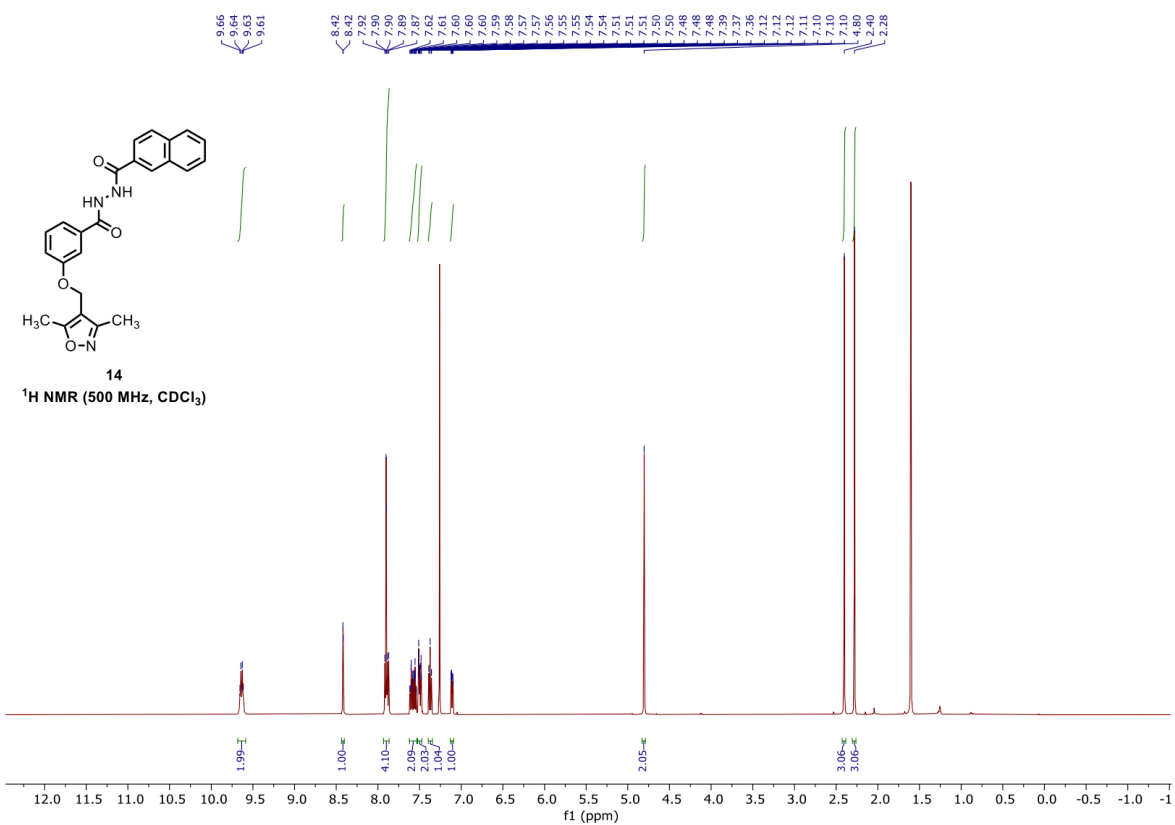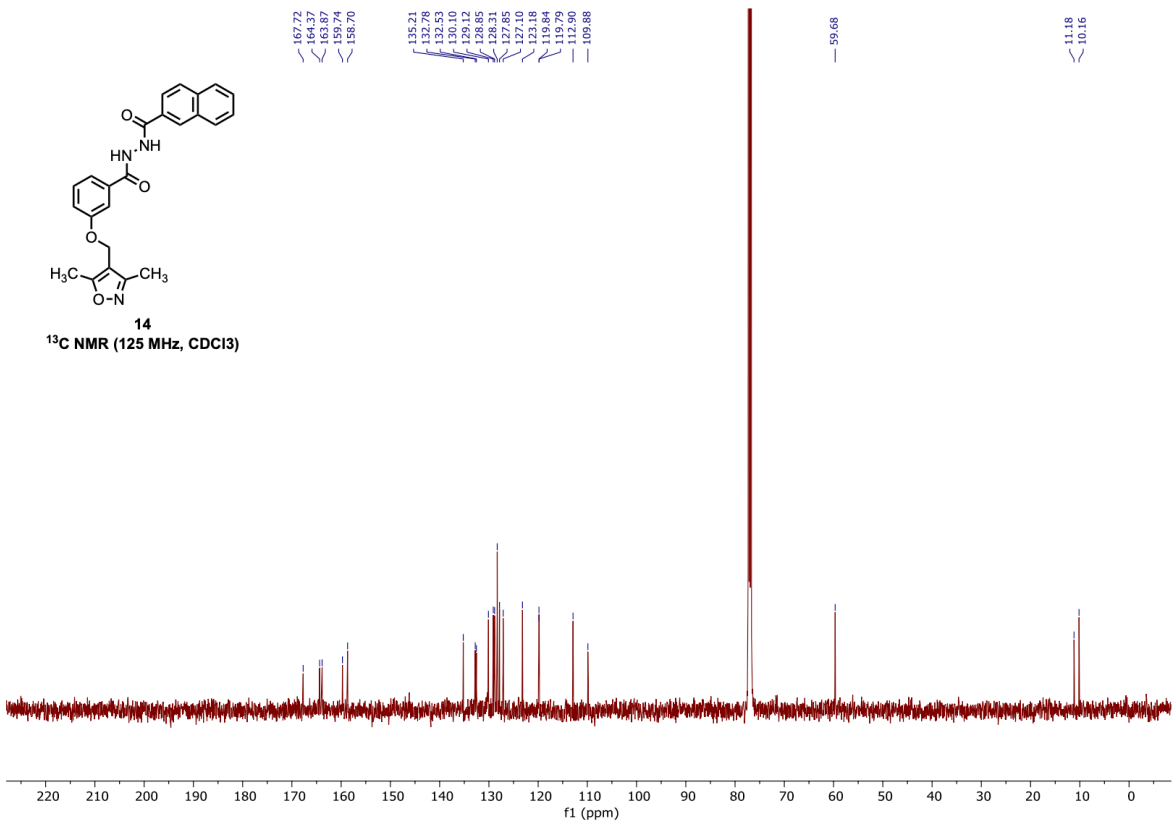

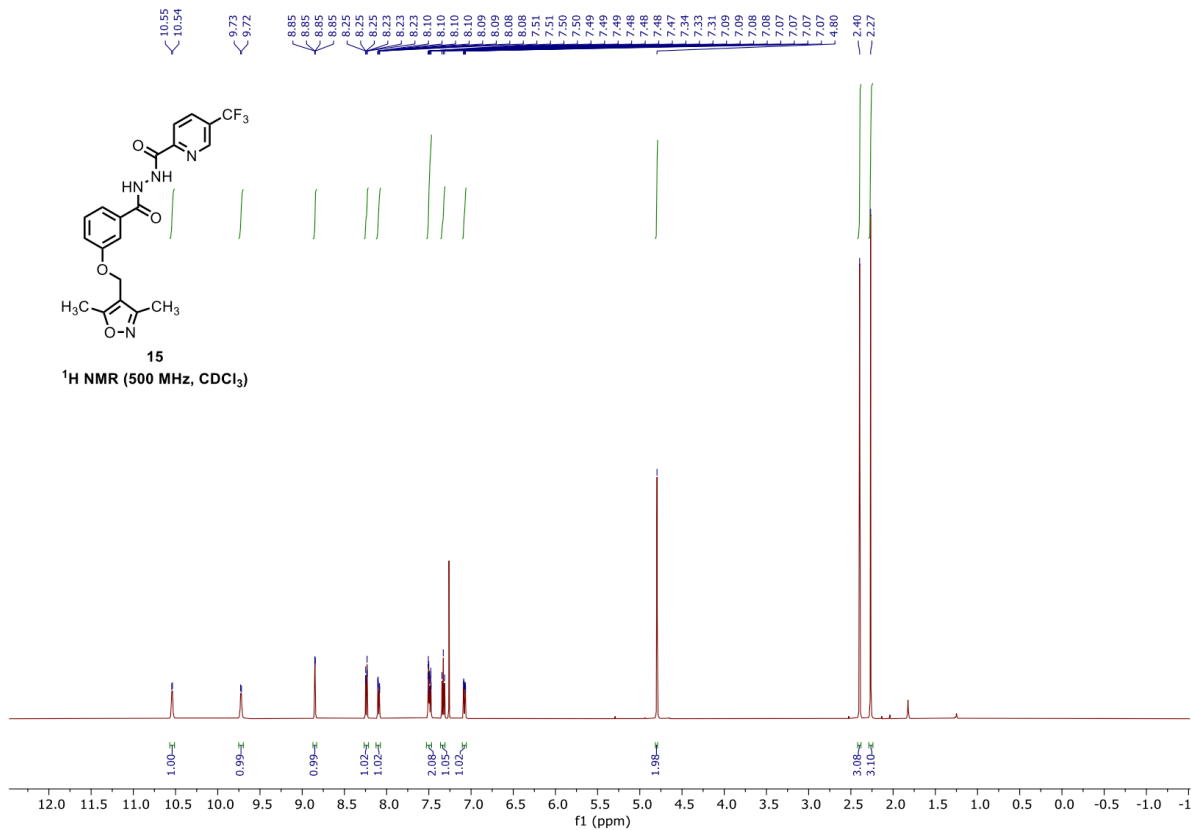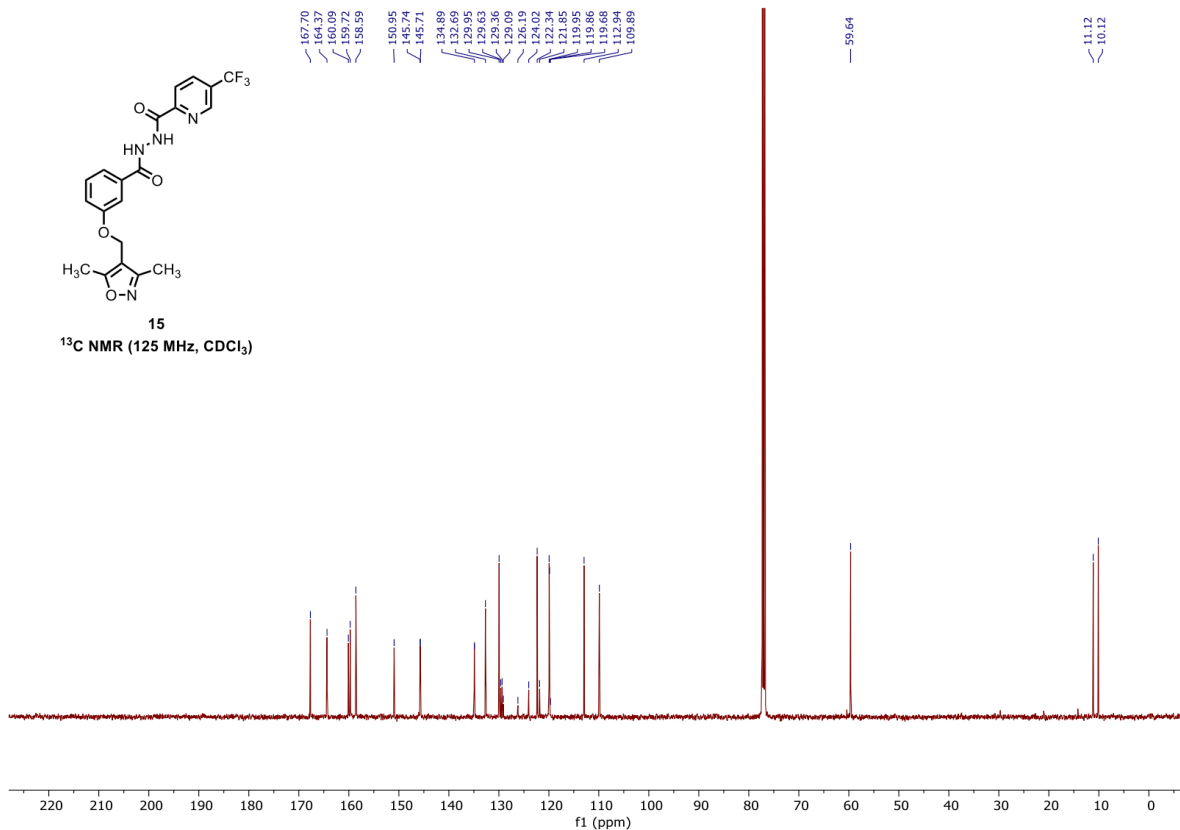



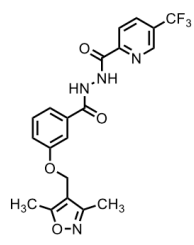

15

<sup>19</sup>F NMR (470 MHz, CDCl<sub>3</sub>)

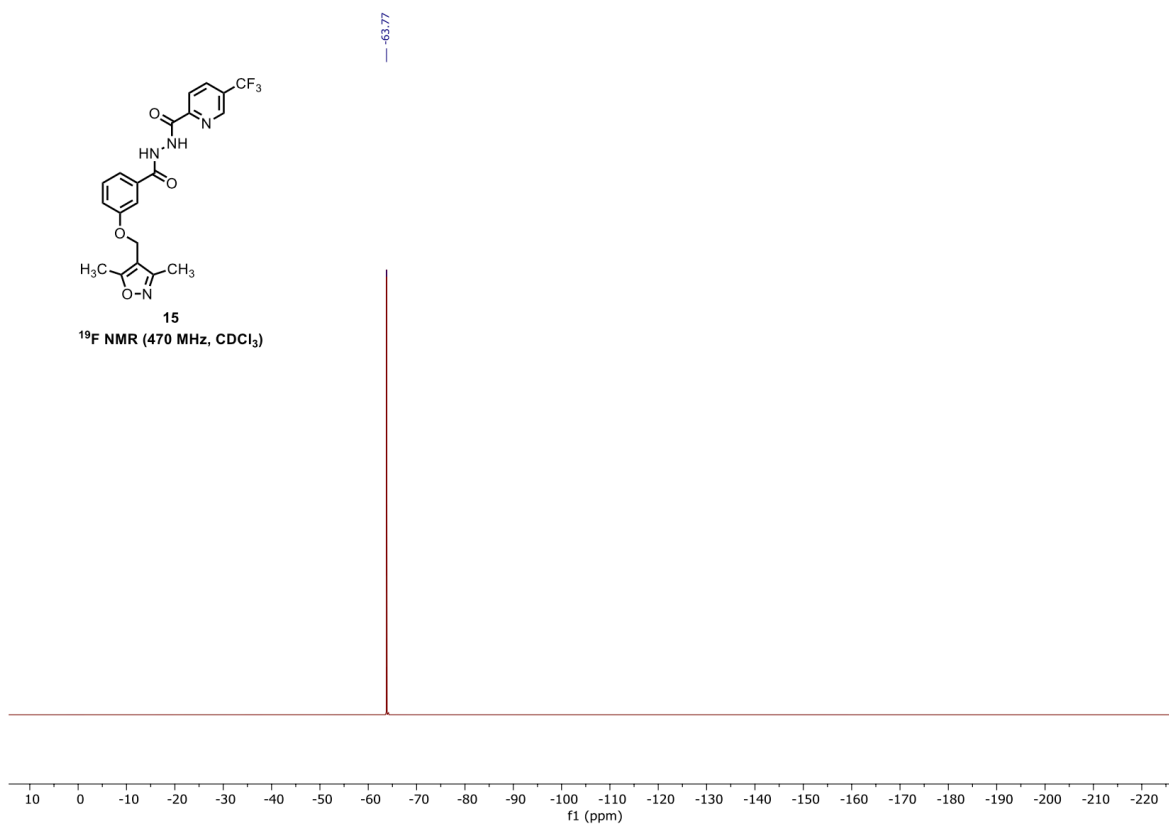

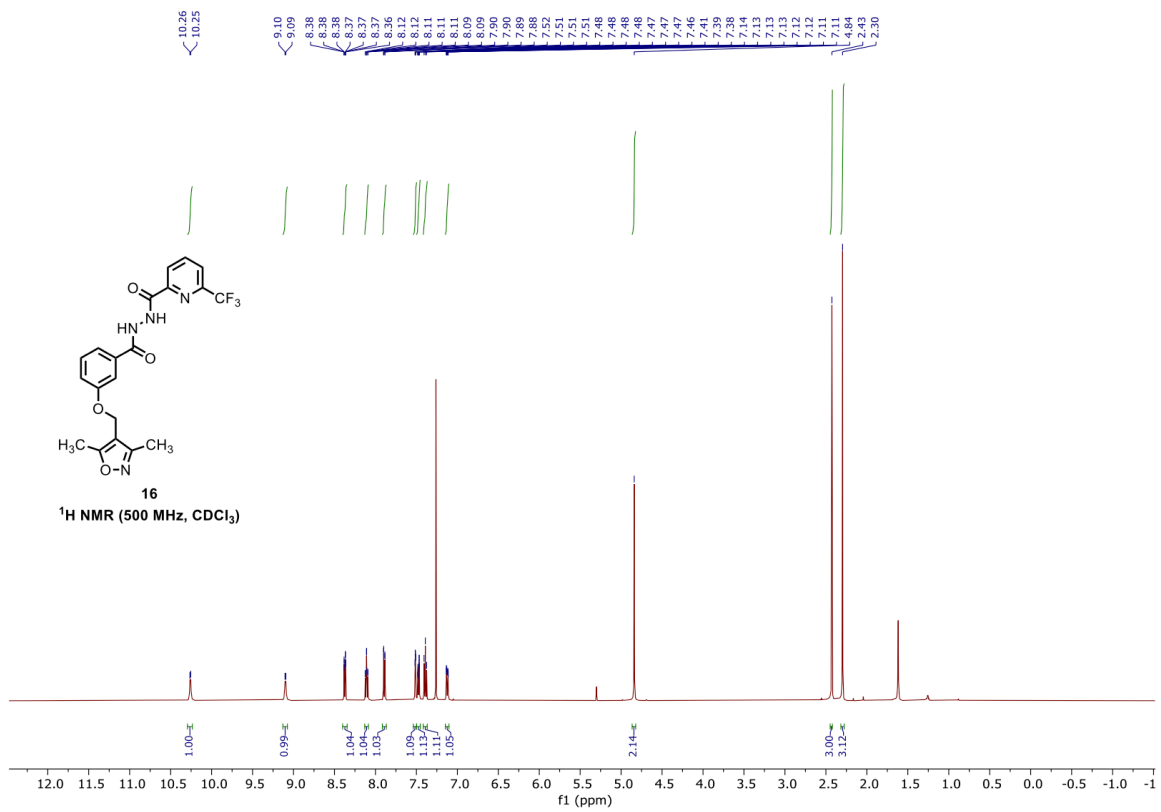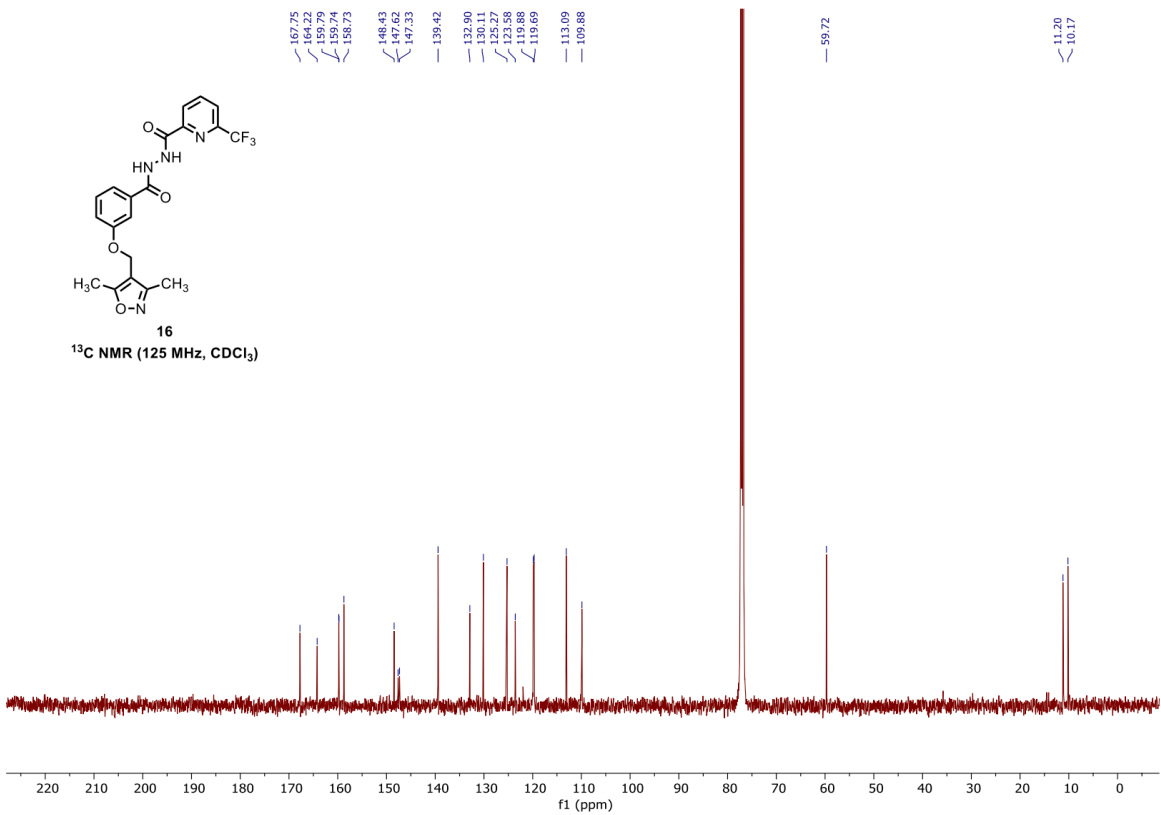

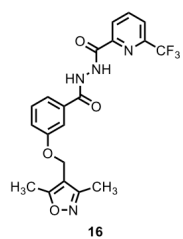

<sup>19</sup>F NMR (470 MHz, CDCl<sub>3</sub>)

-66.98

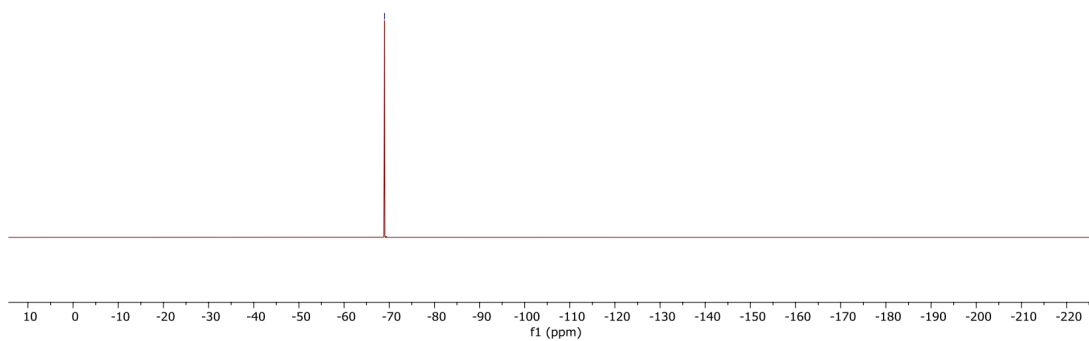

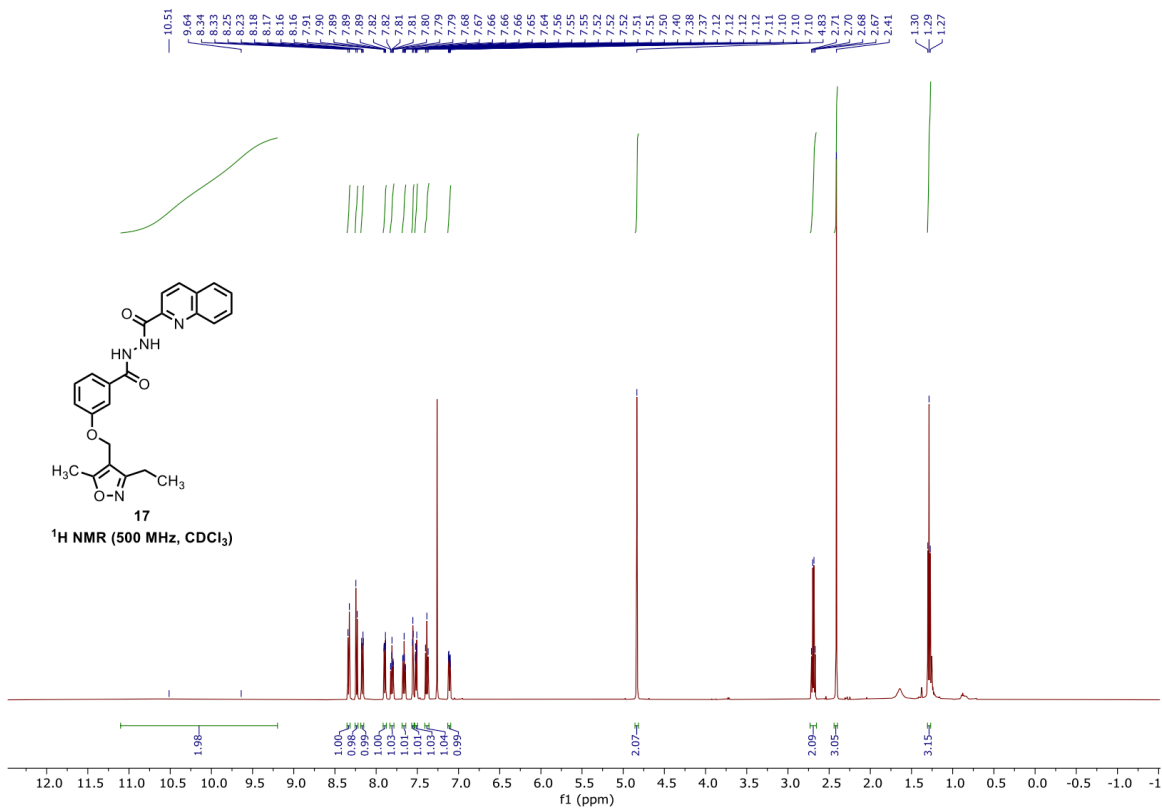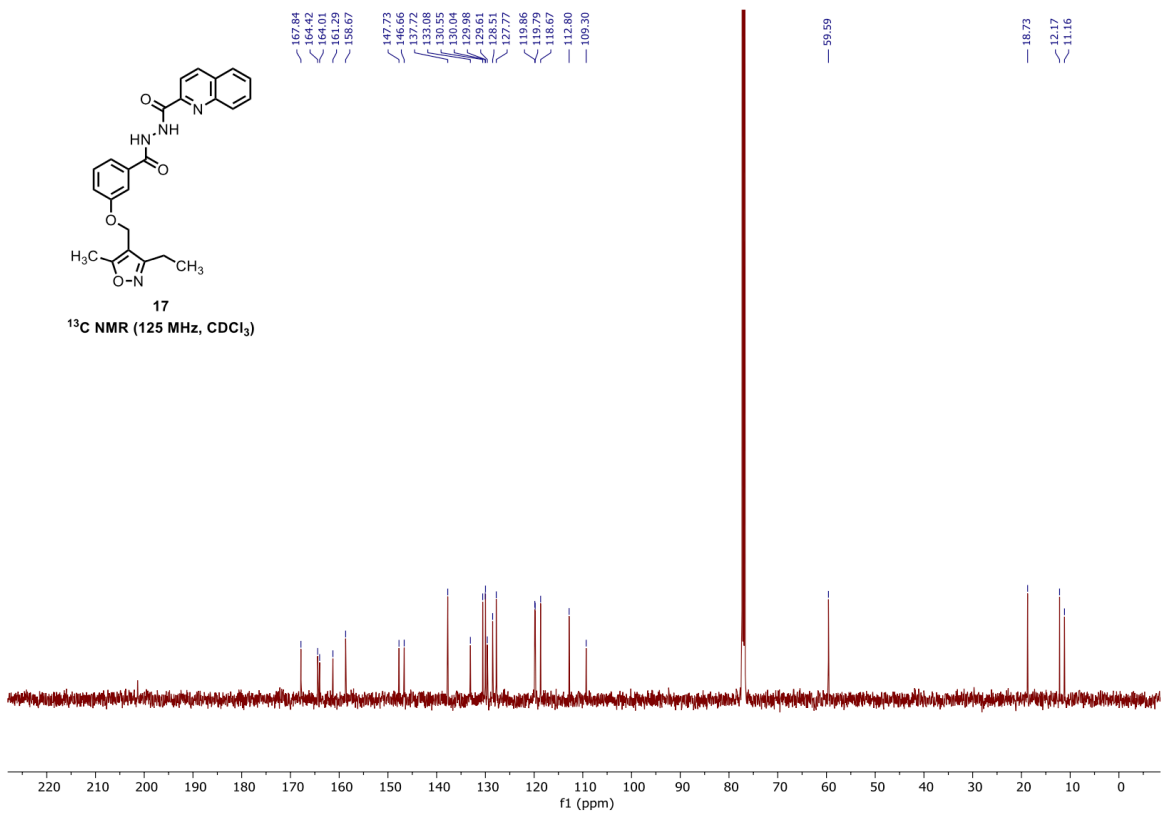

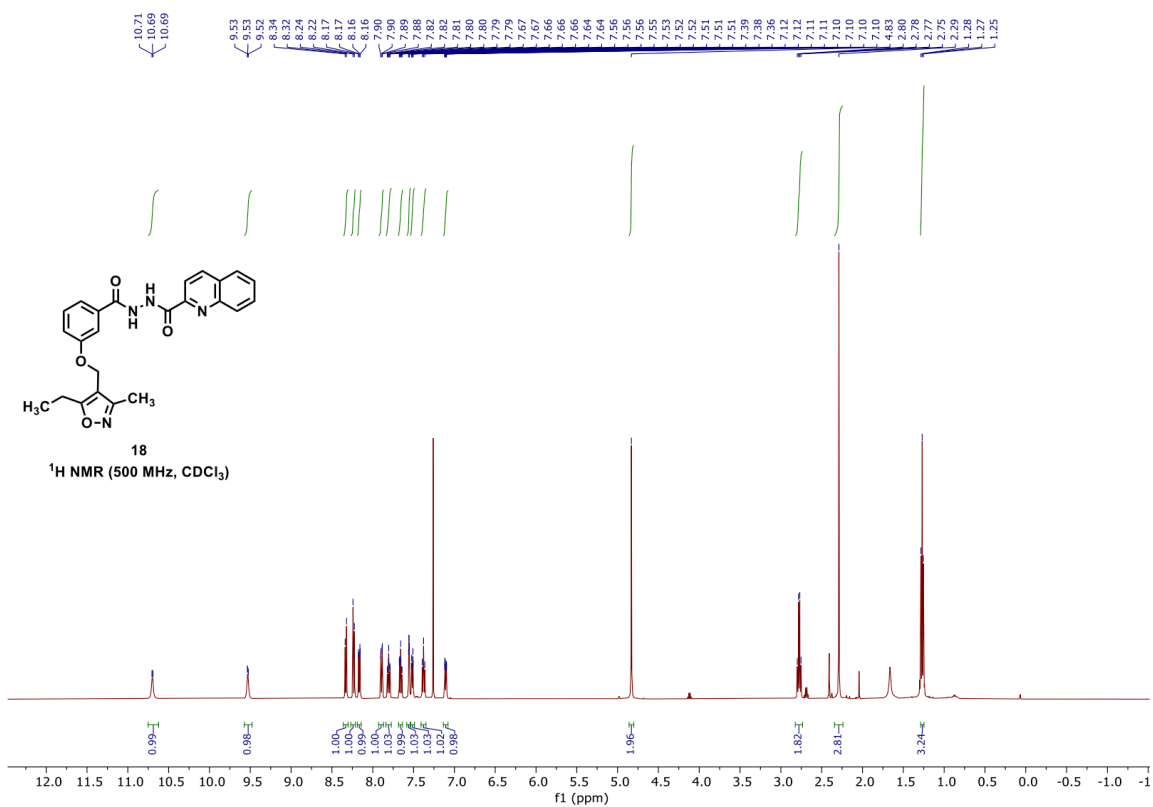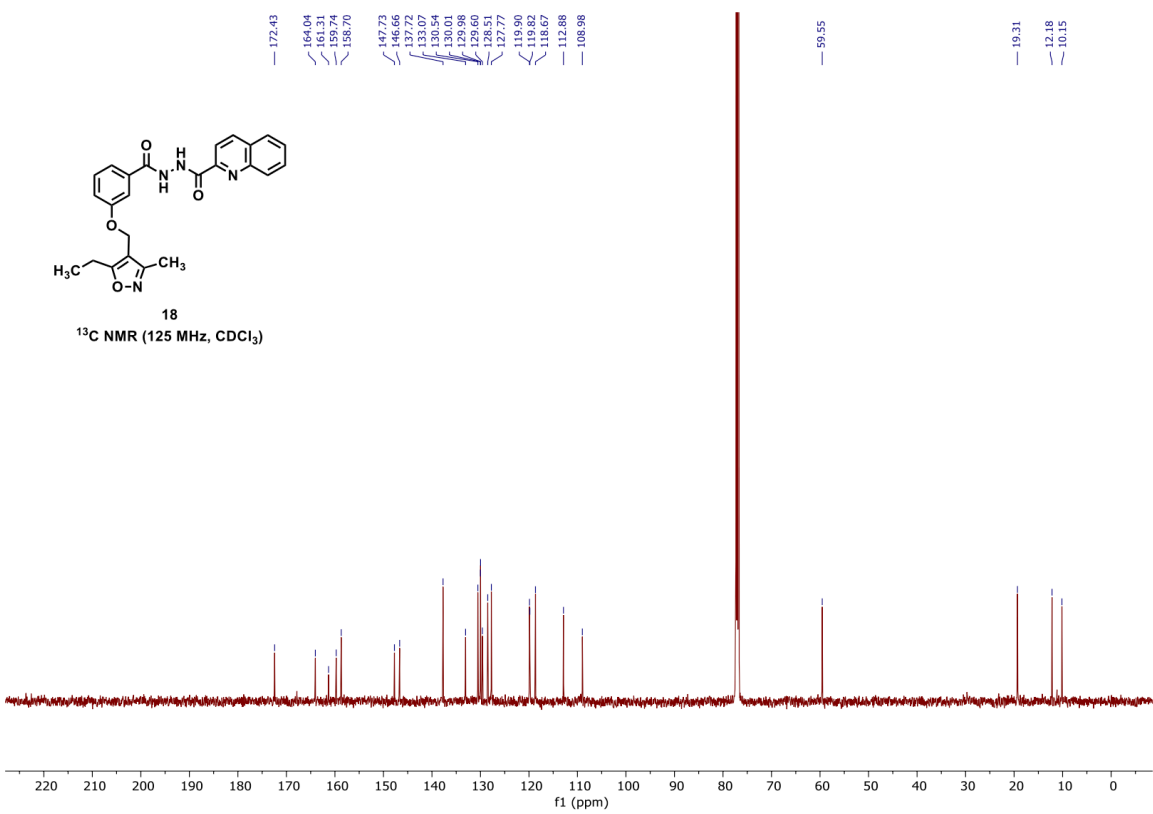

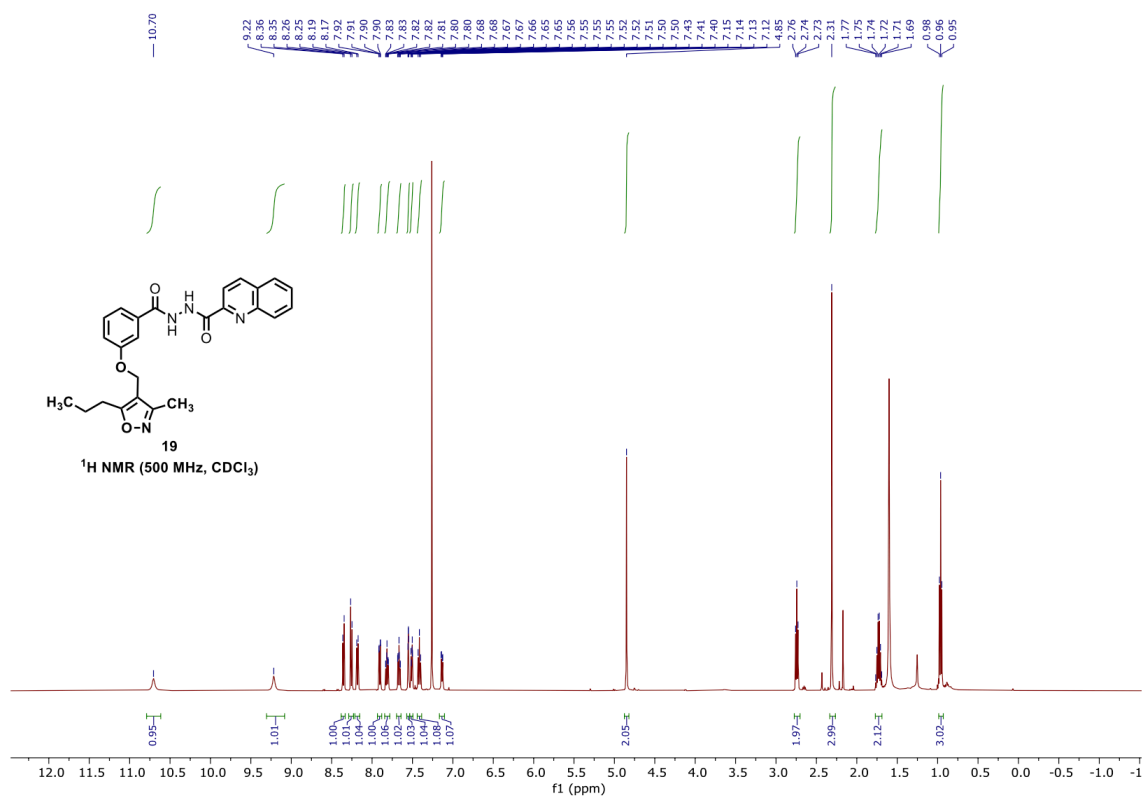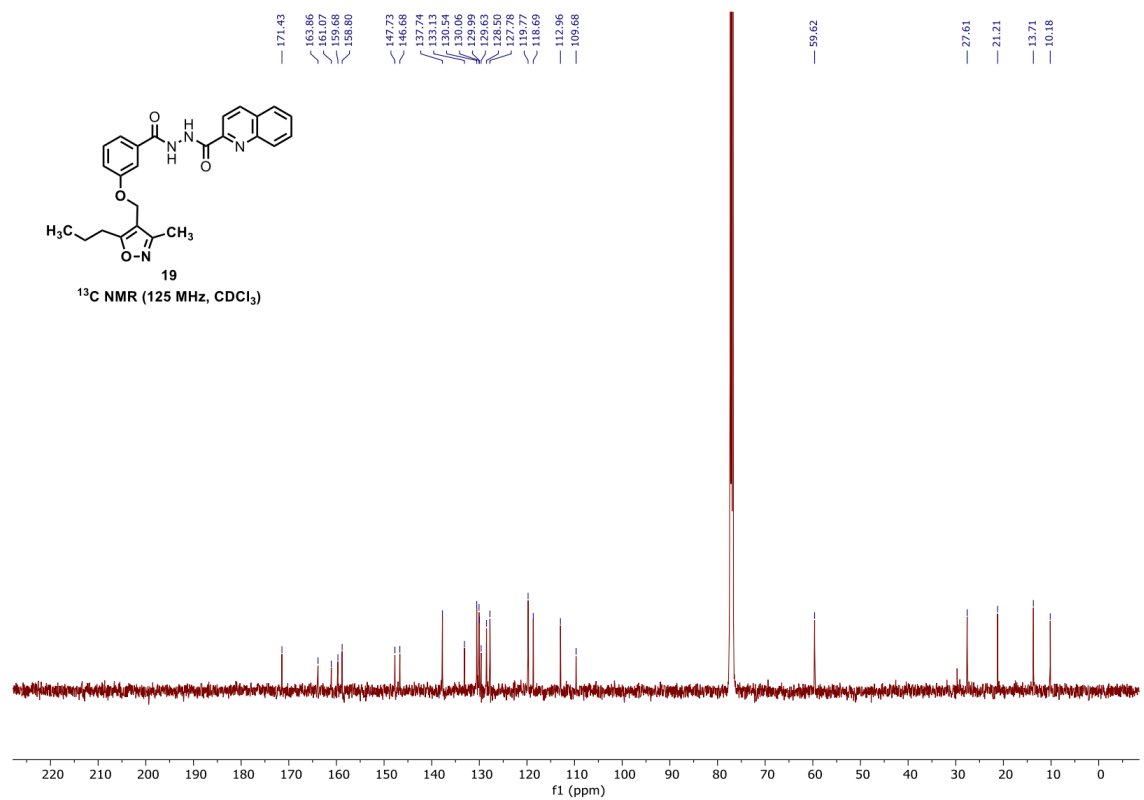

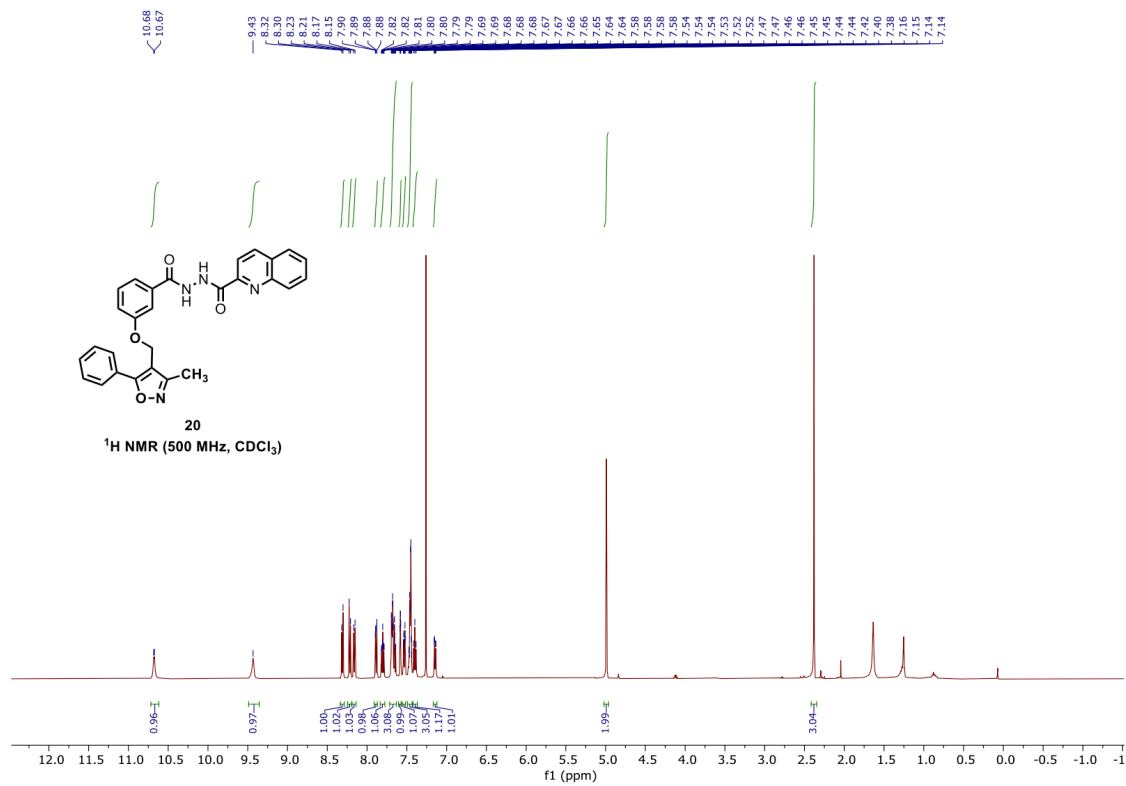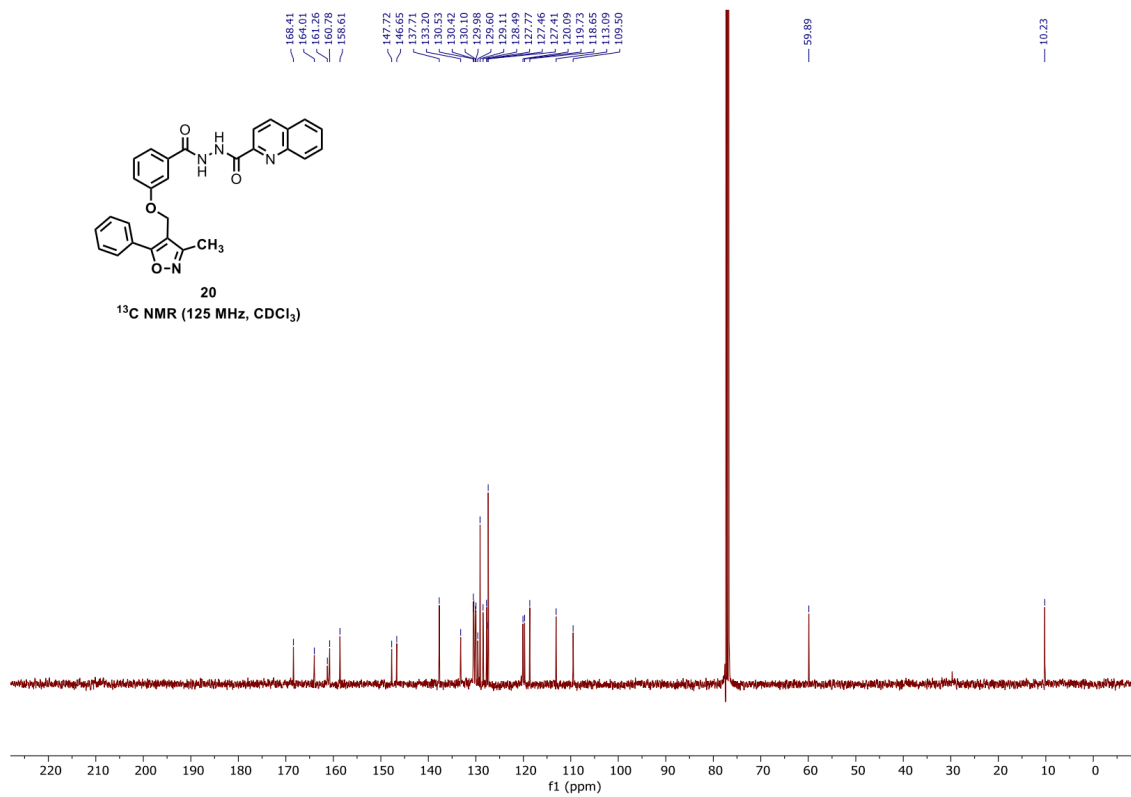



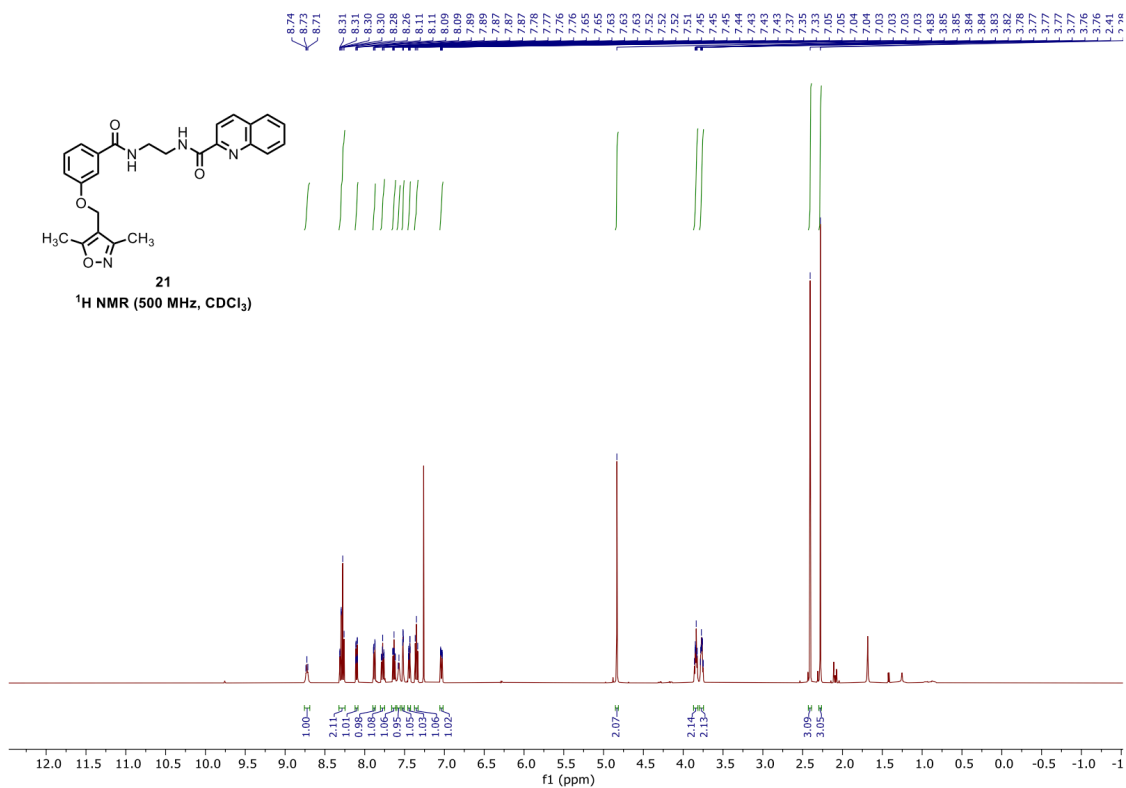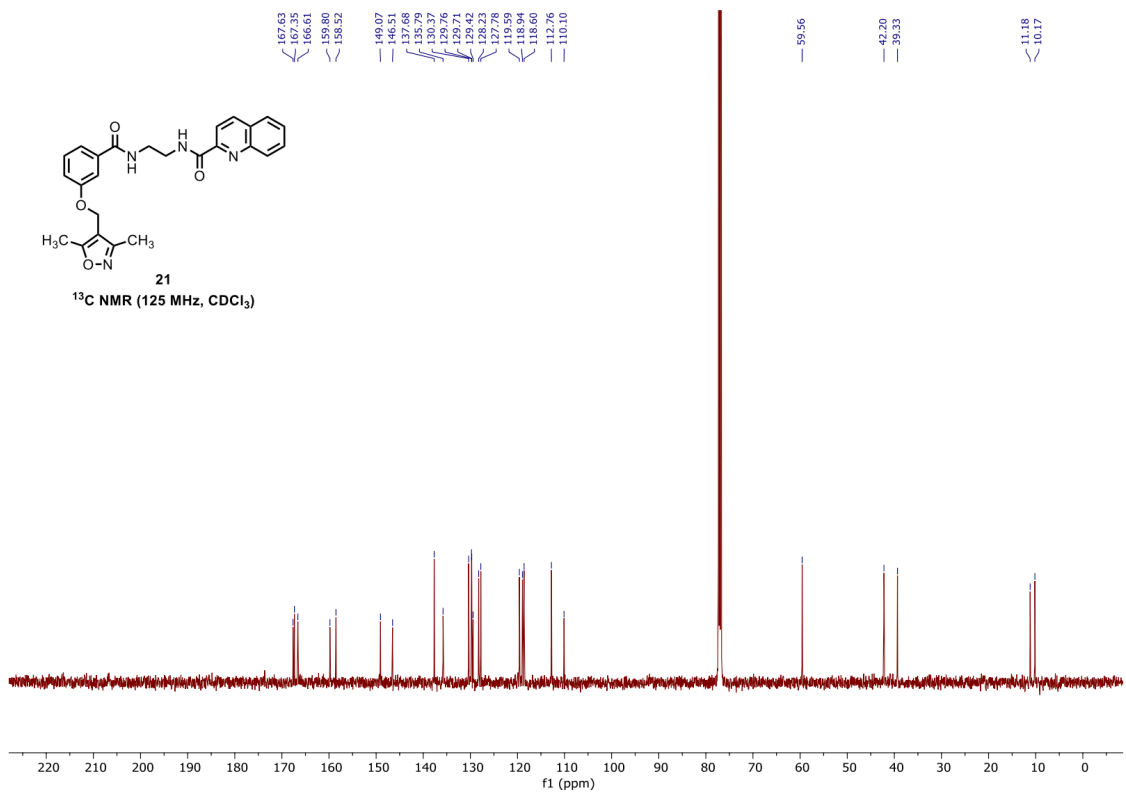

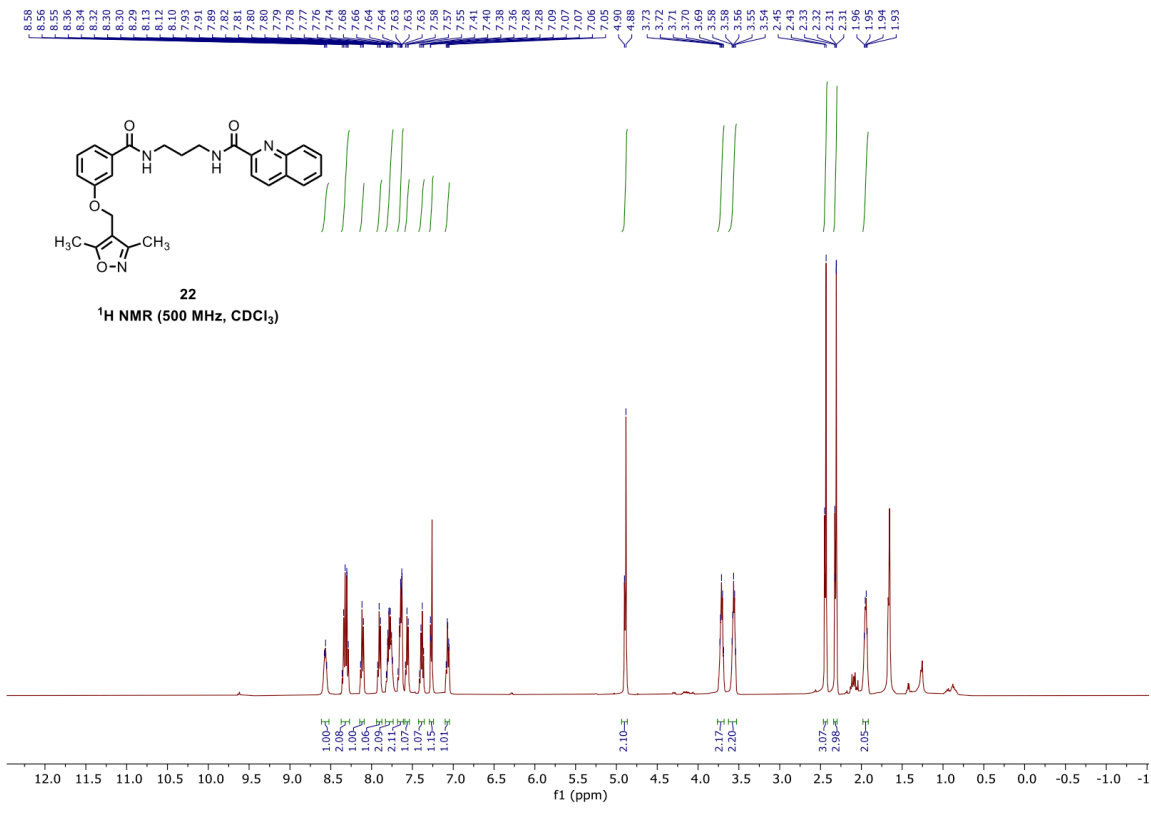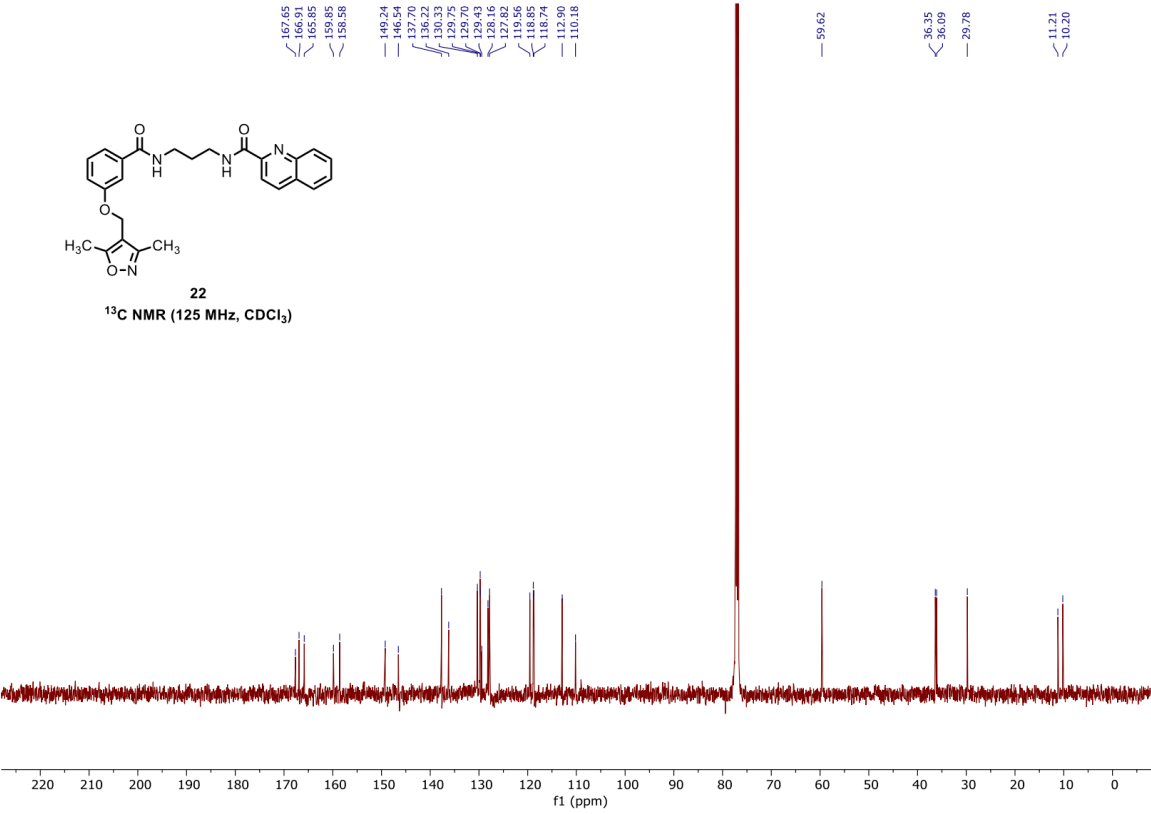

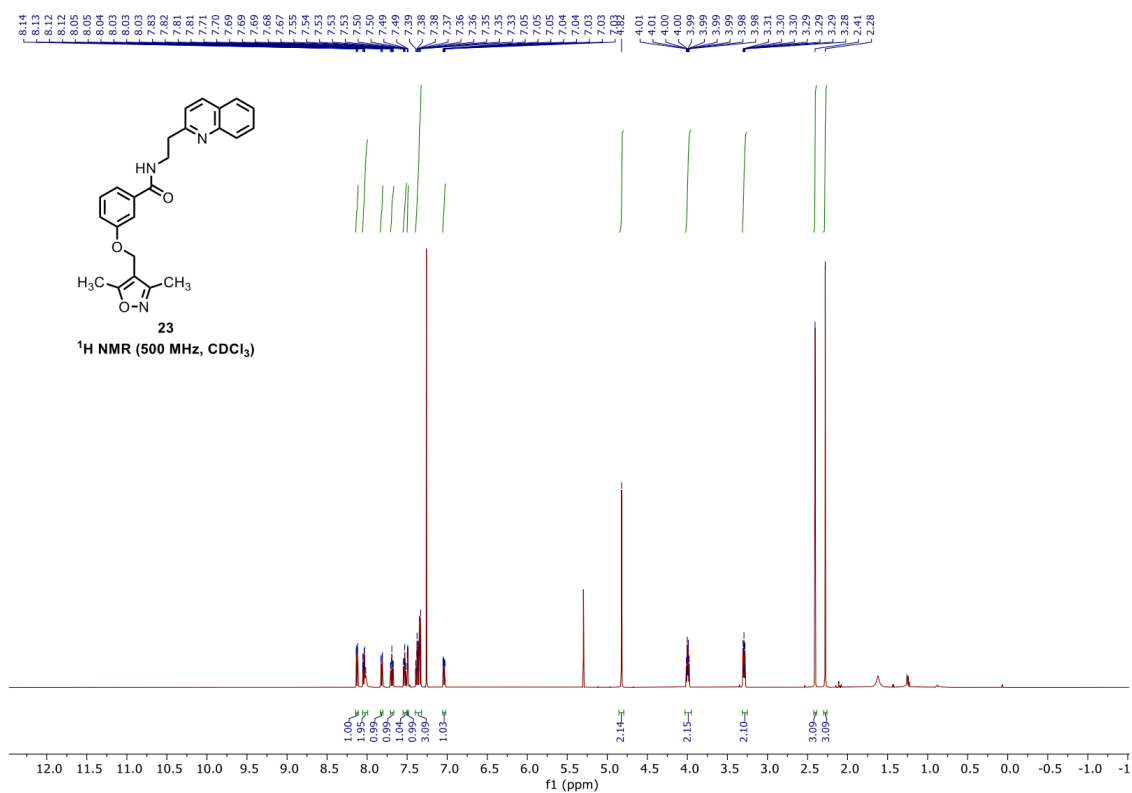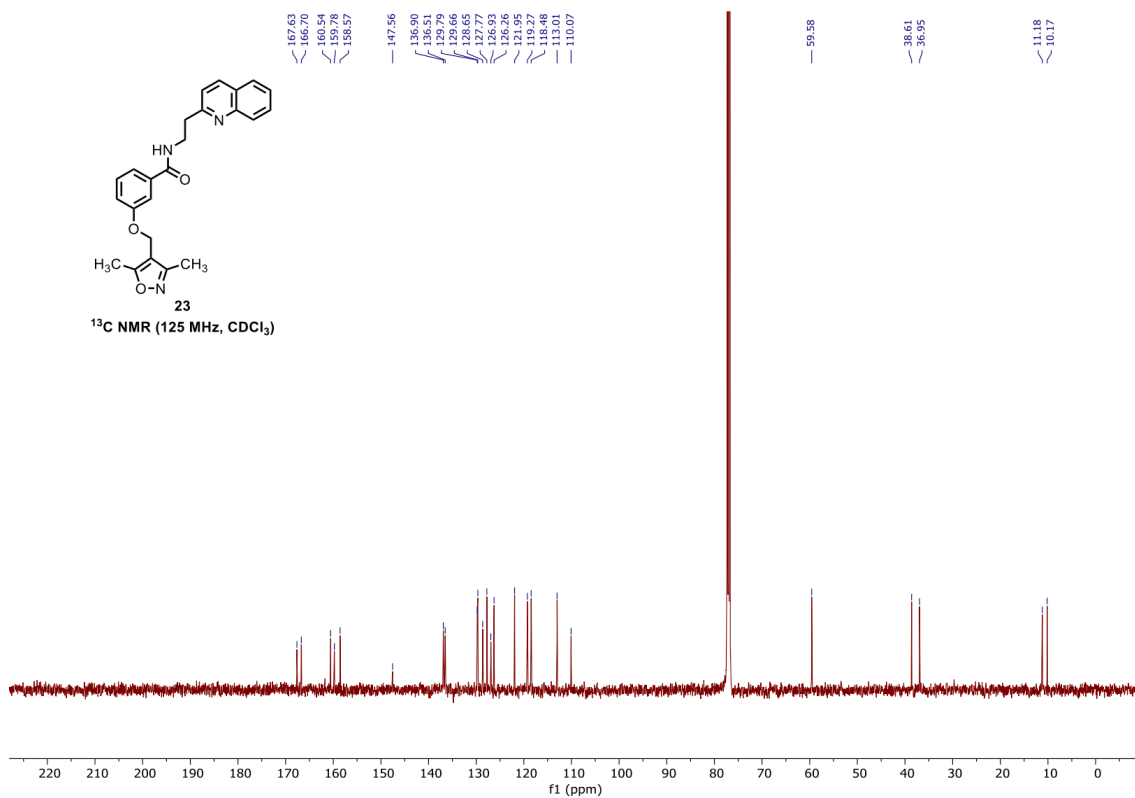

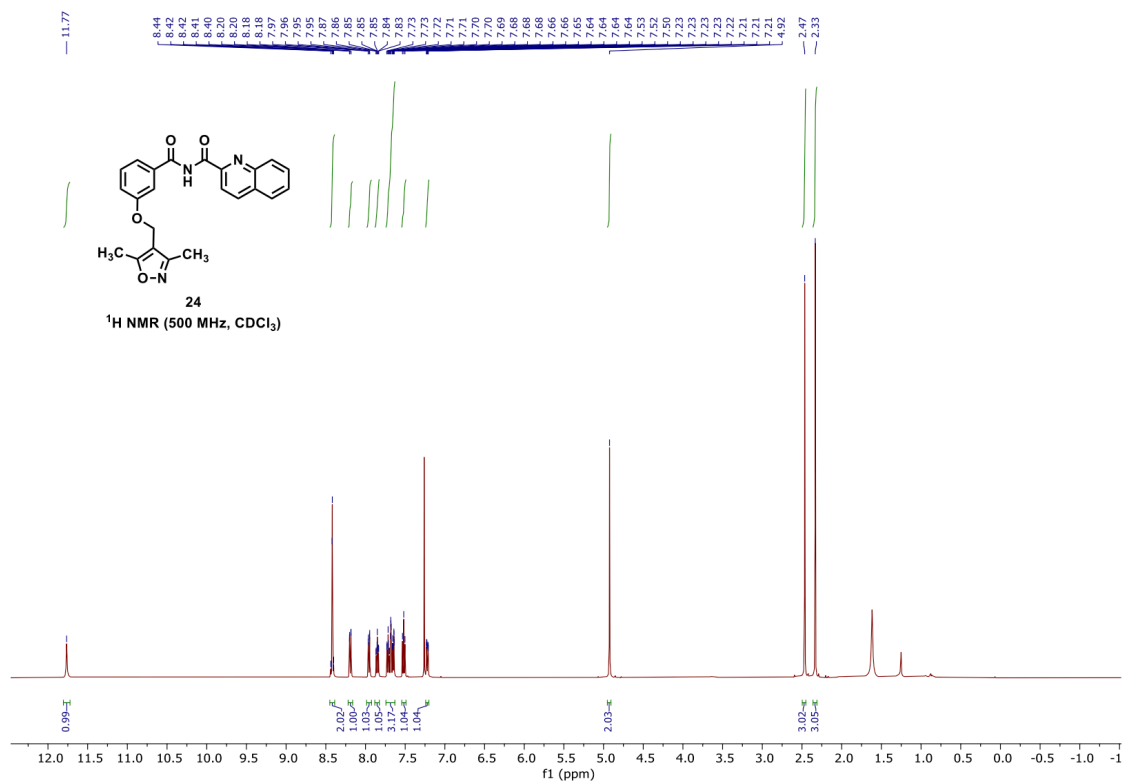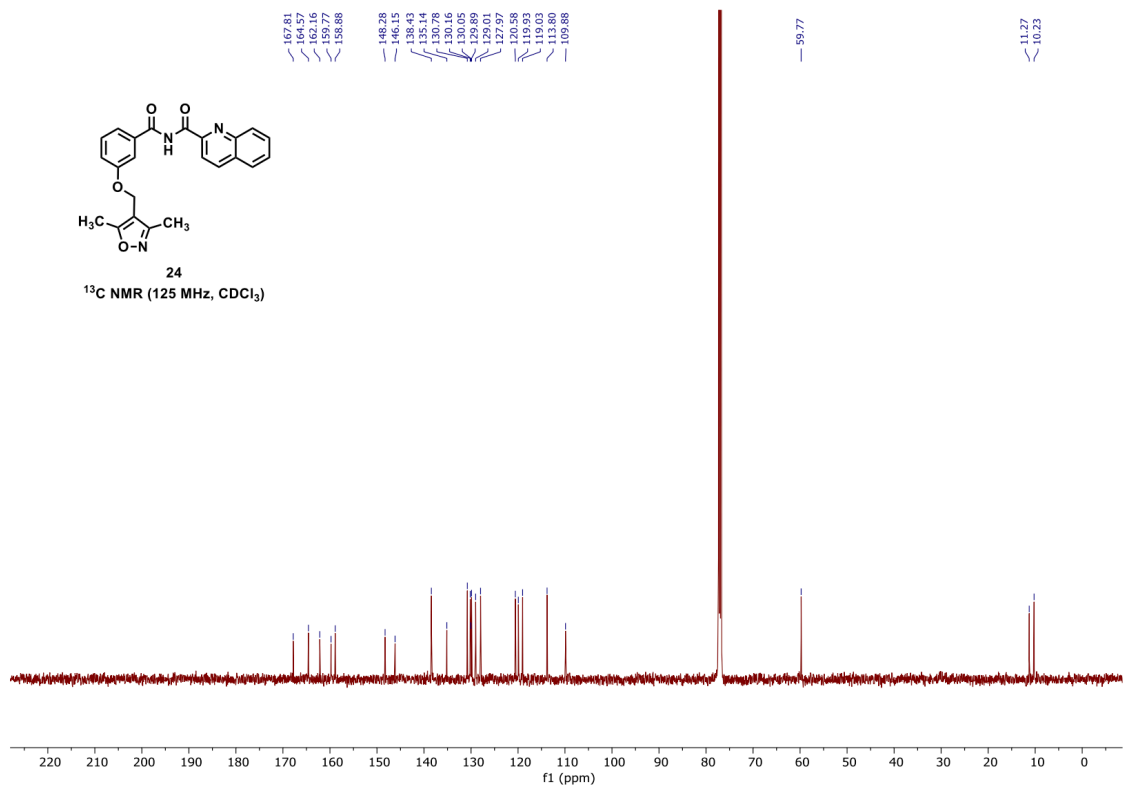

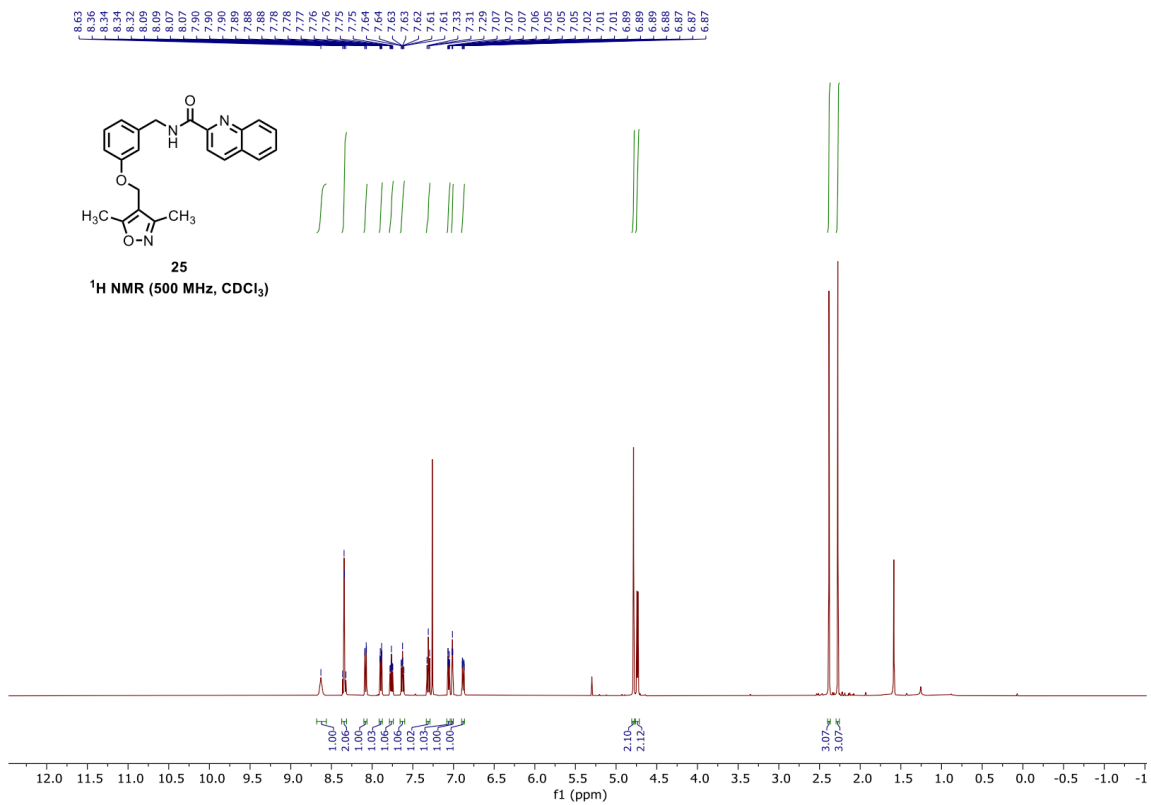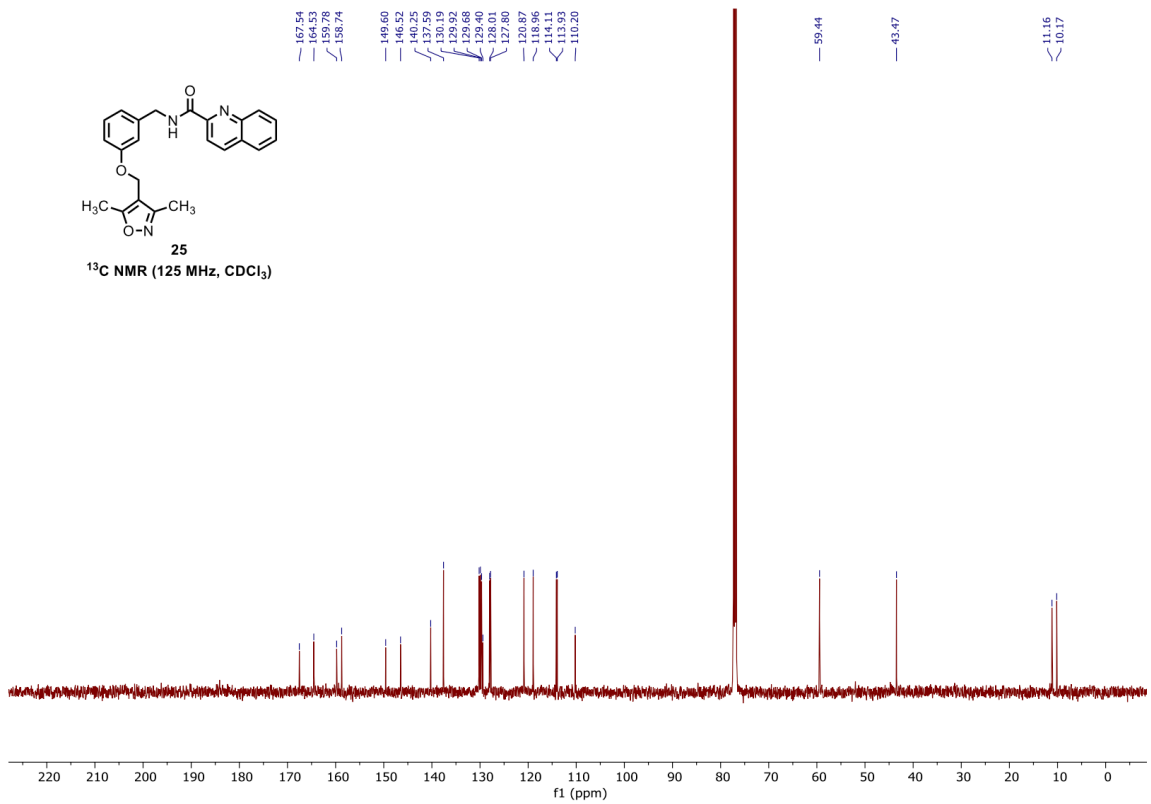

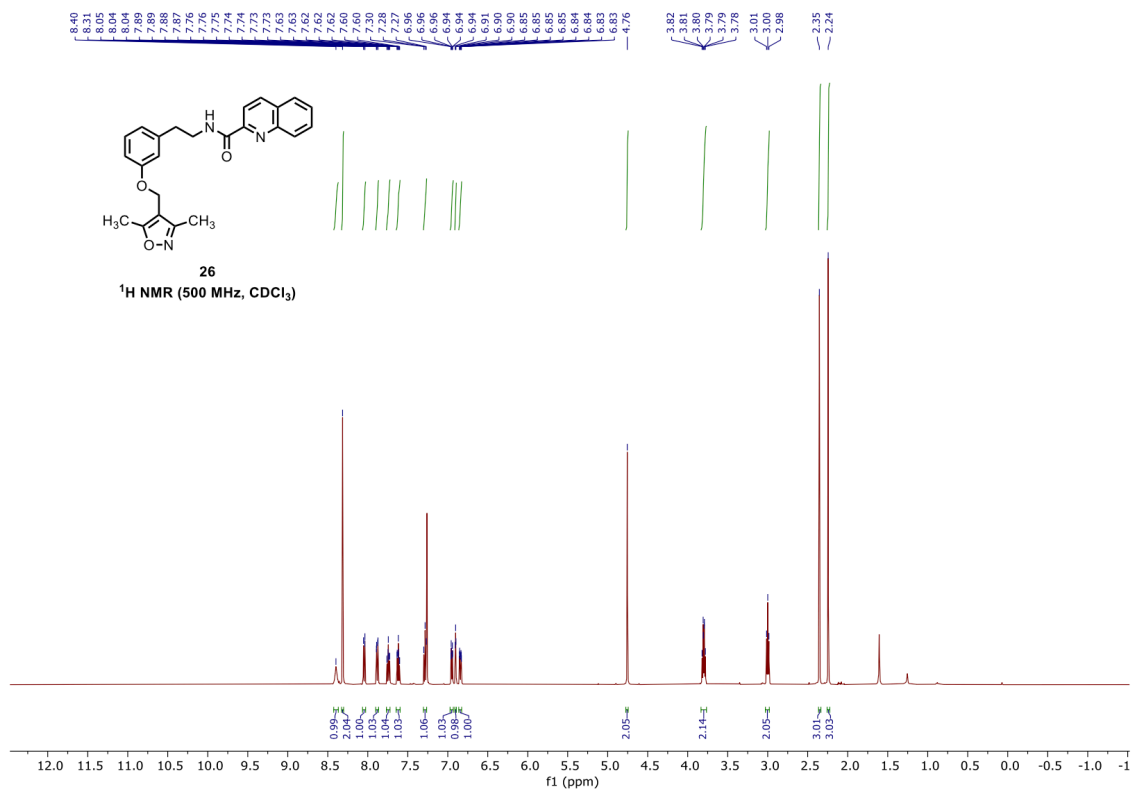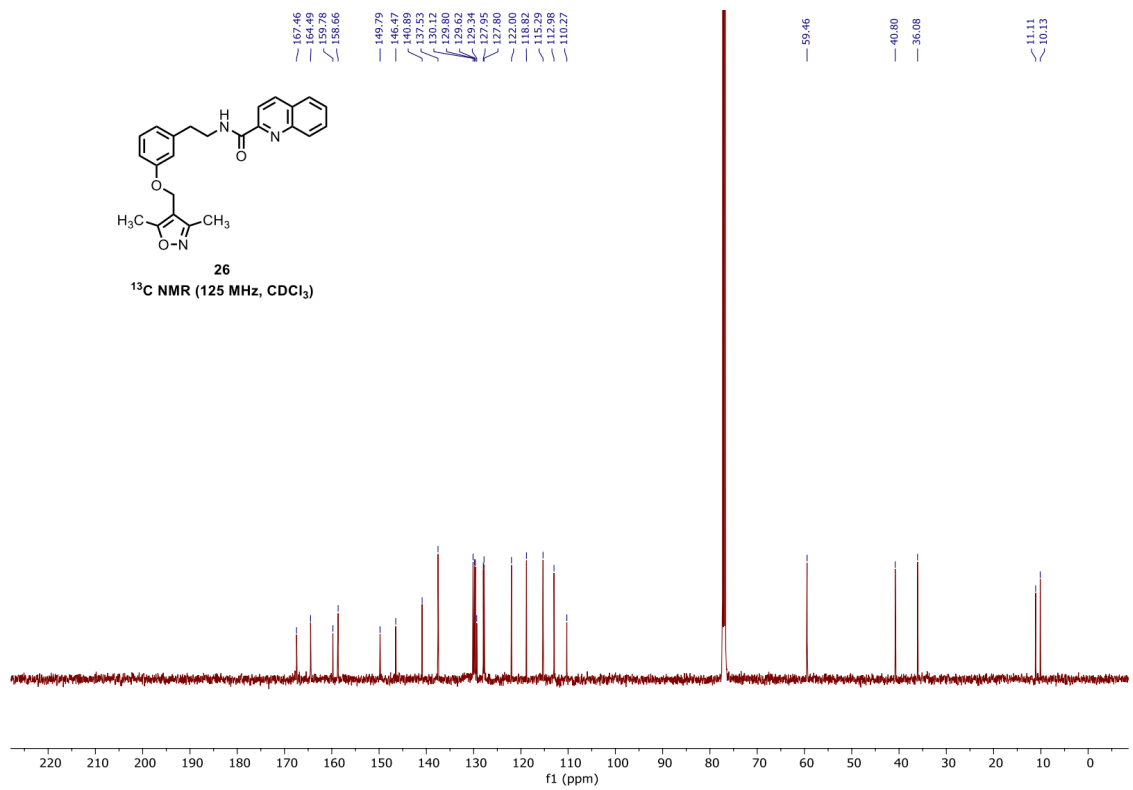

## HPLC Traces

Compound 08 was analyzed using a ThermoScientific Hypersil GOLDC18 column and a gradient of 95:5 to 5:95 H<sub>2</sub>O:ACN.

All other compounds were analyzed using a ZORBAX RRHT Eclipse XDB-C<sub>18</sub> column and a gradient of 95:5 to 5:95 H<sub>2</sub>O:MeCN

8 / 8b

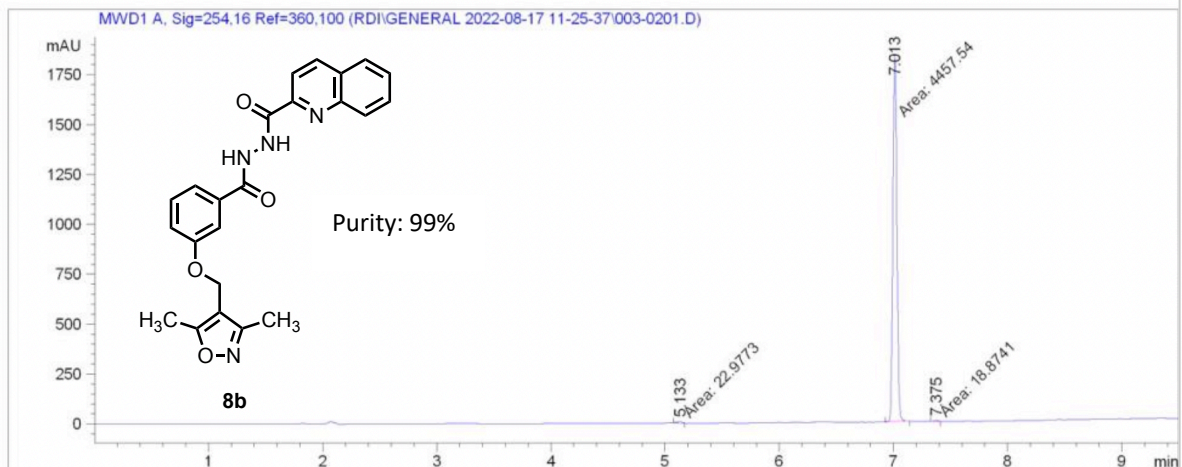

=====  
Area Percent Report  
=====

Sorted By : Signal  
Multiplier: : 1.0000  
Dilution: : 1.0000  
Use Multiplier & Dilution Factor with ISTDs

Signal 1: MWD1 A, Sig=254,16 Ref=360,100

| Peak # | RetTime [min] | Type | Width [min] | Area [mAU*s] | Height [mAU] | Area %  |
|--------|---------------|------|-------------|--------------|--------------|---------|
| 1      | 5.133         | MM   | 0.0482      | 22.97734     | 7.95079      | 0.5107  |
| 2      | 7.013         | MM   | 0.0404      | 4457.53955   | 1839.15613   | 99.0698 |
| 3      | 7.375         | MM   | 0.0546      | 18.87412     | 5.76048      | 0.4195  |

Totals : 4499.39102 1852.86740

=====  
\*\*\* End of Report \*\*\*



13

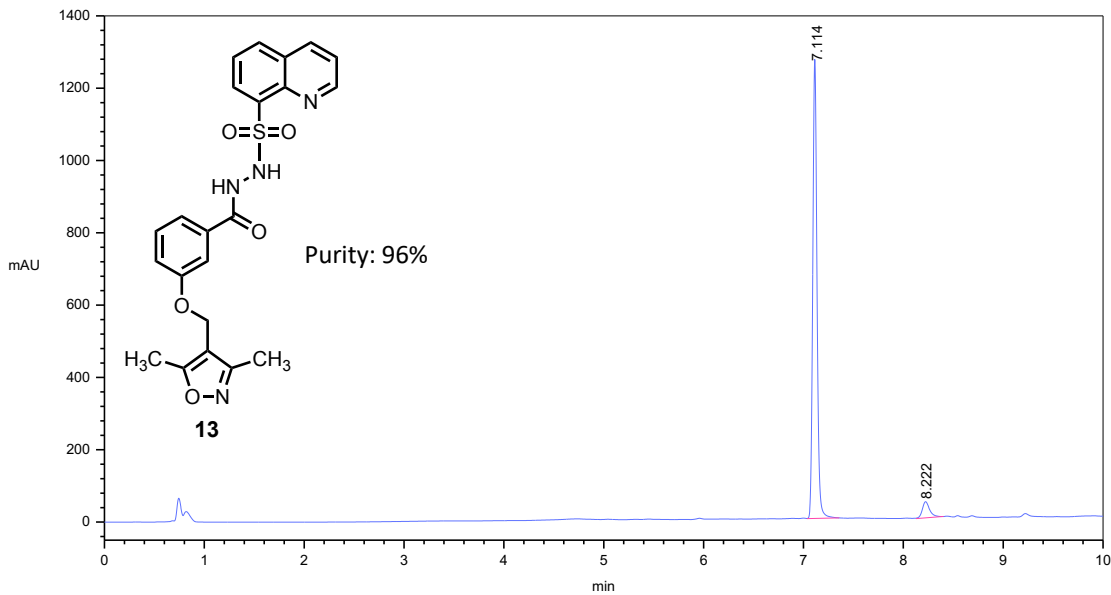

| Peak | RetTime (min) | Area (mAU*s) | Height (mAU) | Area (%) |
|------|---------------|--------------|--------------|----------|
| 1    | 7.114         | 3705.53052   | 1271.52686   | 96.4761  |
| 2    | 8.222         | 135.34927    | 35.57998     | 3.5239   |

14

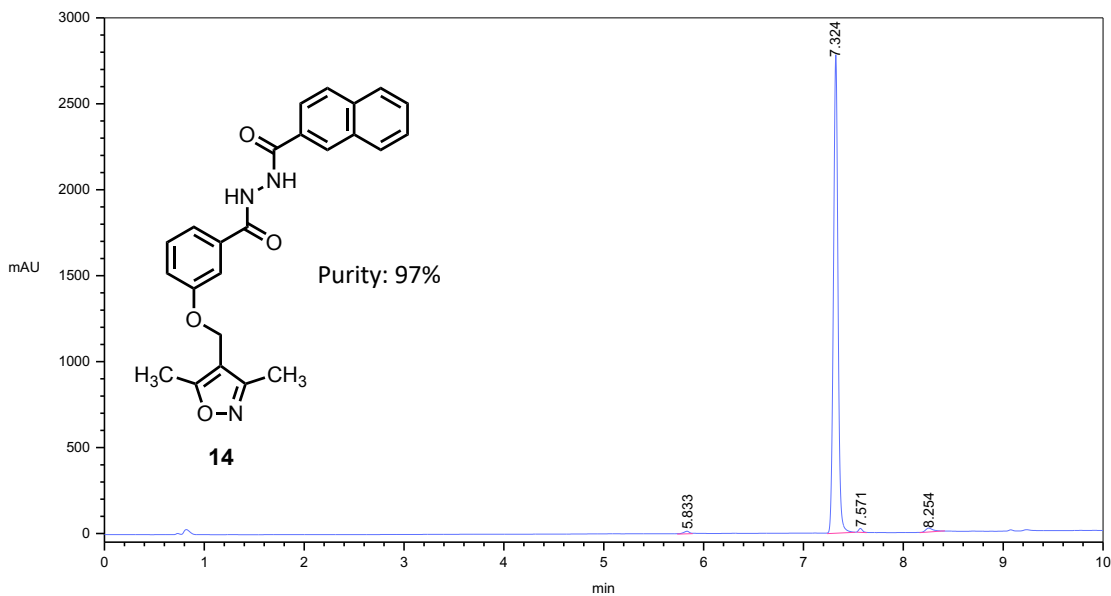

| Peak | RetTime (min) | Area (mAU*s) | Height (mAU) | Area (%) |
|------|---------------|--------------|--------------|----------|
| 1    | 5.833         | 61.08140     | 15.20389     | 0.6894   |
| 2    | 7.324         | 8590.08398   | 2775.23120   | 96.9537  |
| 3    | 7.571         | 56.51580     | 21.47472     | 0.6379   |
| 4    | 8.254         | 152.30571    | 27.02657     | 1.7190   |

15

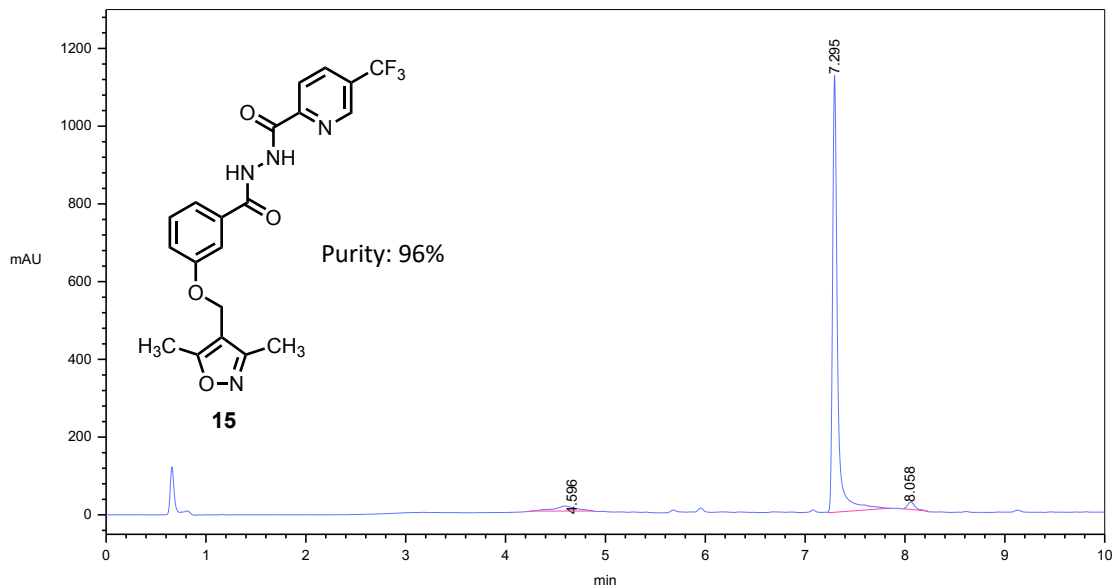

| Peak | RetTime (min) | Area (mAU*s) | Height (mAU) | Area (%) |
|------|---------------|--------------|--------------|----------|
| 1    | 4.596         | 62.20026     | 7.93594      | 1.6179   |
| 2    | 7.295         | 3699.60425   | 1124.70386   | 96.2280  |
| 3    | 8.058         | 75.41700     | 17.86606     | 1.9616   |

16

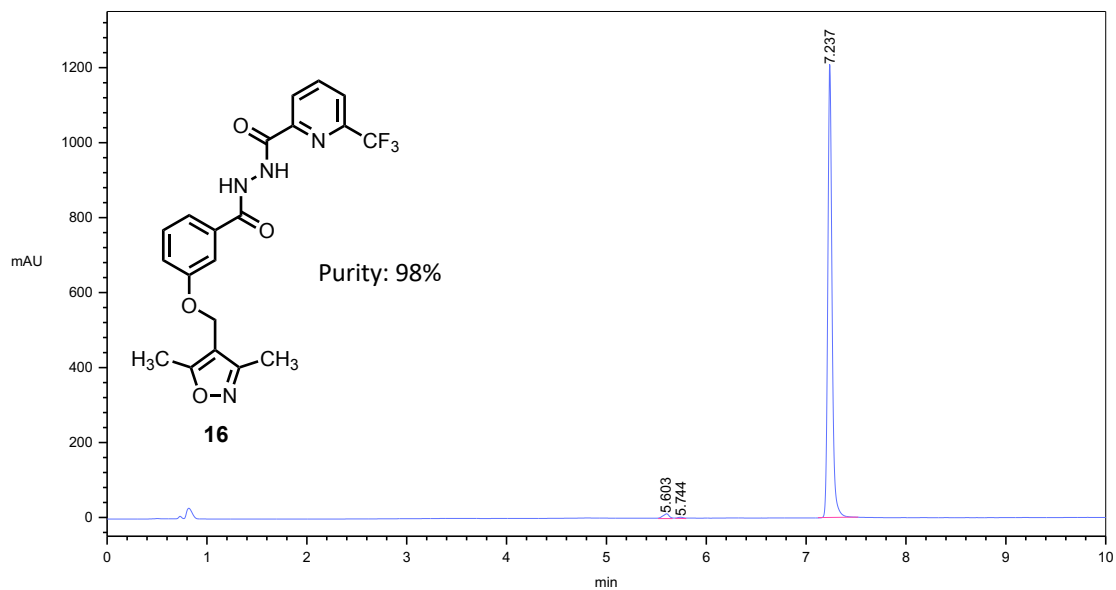

| Peak | RetTime (min) | Area (mAU*s) | Height (mAU) | Area (%) |
|------|---------------|--------------|--------------|----------|
| 1    | 5.603         | 56.94898     | 12.59515     | 1.5413   |
| 2    | 5.744         | 32.49028     | 6.30248      | 0.8793   |
| 3    | 7.237         | 3605.36768   | 1210.73450   | 97.5793  |

17

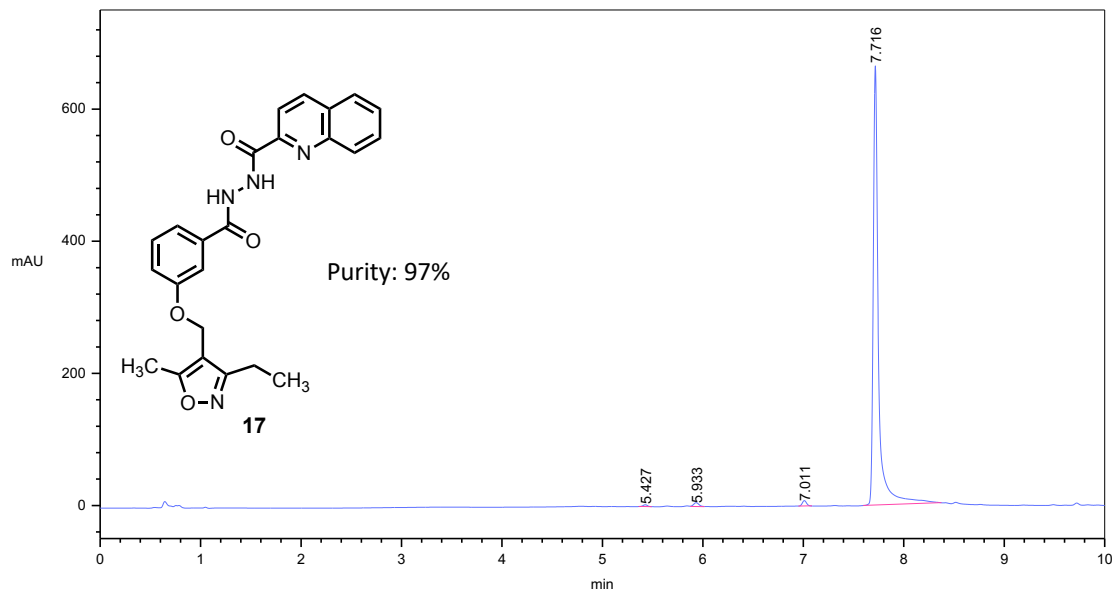

| Peak | RetTime (min) | Area (mAU*s) | Height (mAU) | Area (%) |
|------|---------------|--------------|--------------|----------|
| 1    | 5.427         | 11.49231     | 3.64736      | 0.4777   |
| 2    | 5.933         | 31.63272     | 7.60844      | 1.3149   |
| 3    | 7.011         | 24.67721     | 8.18935      | 1.0258   |
| 4    | 7.716         | 2337.91943   | 665.76617    | 97.1816  |

18

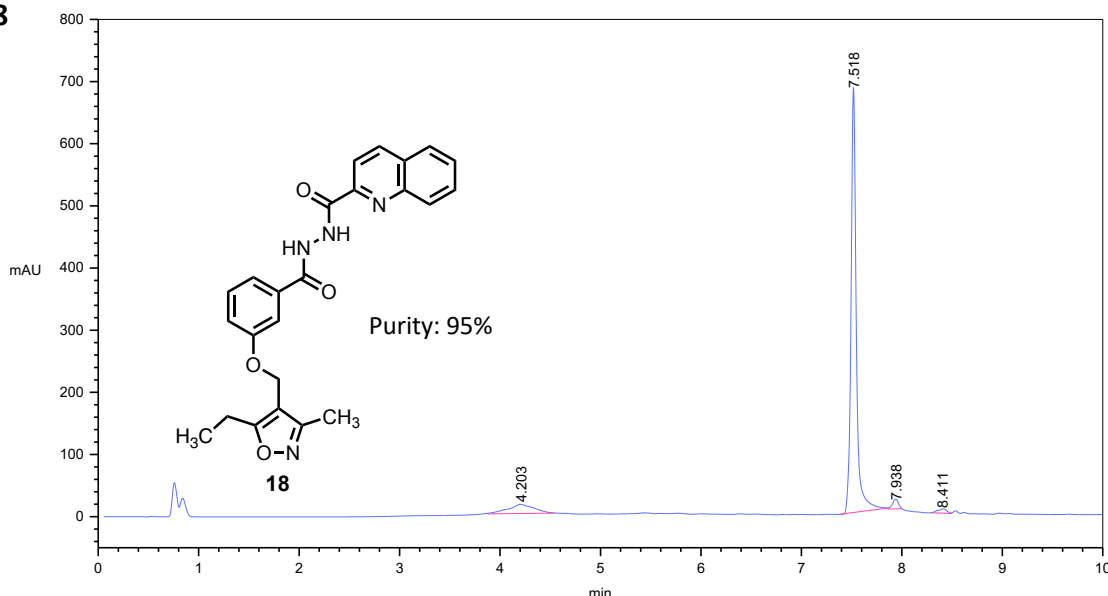

| Peak | RetTime (min) | Area (mAU*s) | Height (mAU) | Area (%) |
|------|---------------|--------------|--------------|----------|
| 1    | 4.203         | 85.08701     | 8.64702      | 3.2319   |
| 2    | 7.518         | 2501.45166   | 684.45831    | 95.0142  |
| 3    | 7.938         | 26.94125     | 9.78608      | 1.0233   |
| 4    | 8.411         | 19.23445     | 4.65337      | 0.7306   |

19

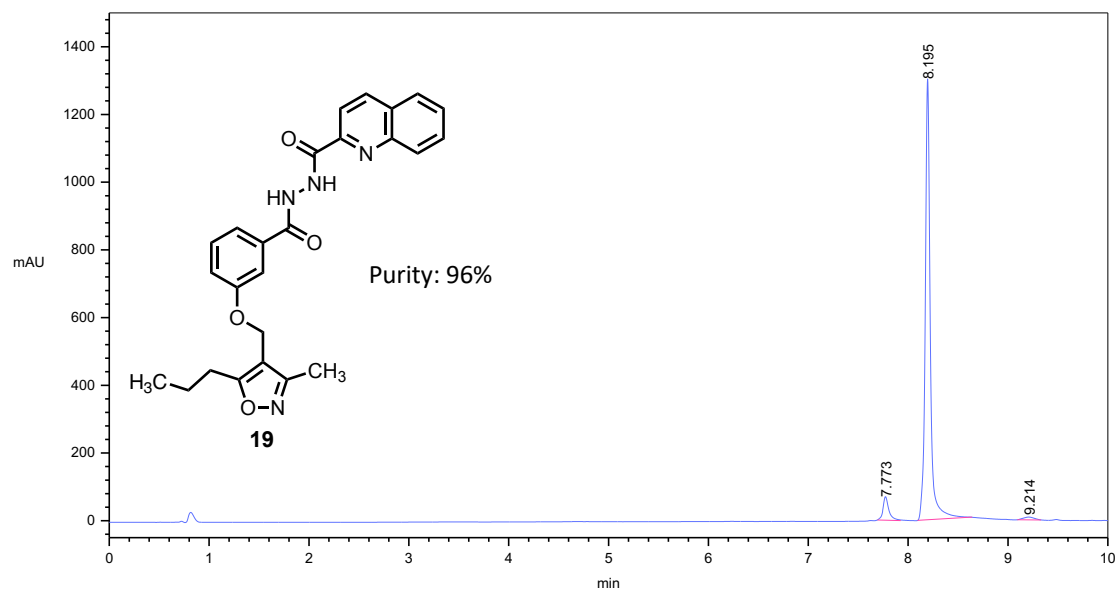

| Peak | RetTime (min) | Area (mAU*s) | Height (mAU) | Area (%) |
|------|---------------|--------------|--------------|----------|
| 1    | 7.773         | 163.93793    | 56.67533     | 3.4324   |
| 2    | 8.195         | 4564.75448   | 1304.48206   | 95.5730  |
| 3    | 9.214         | 47.50674     | 7.12561      | 0.9947   |

20

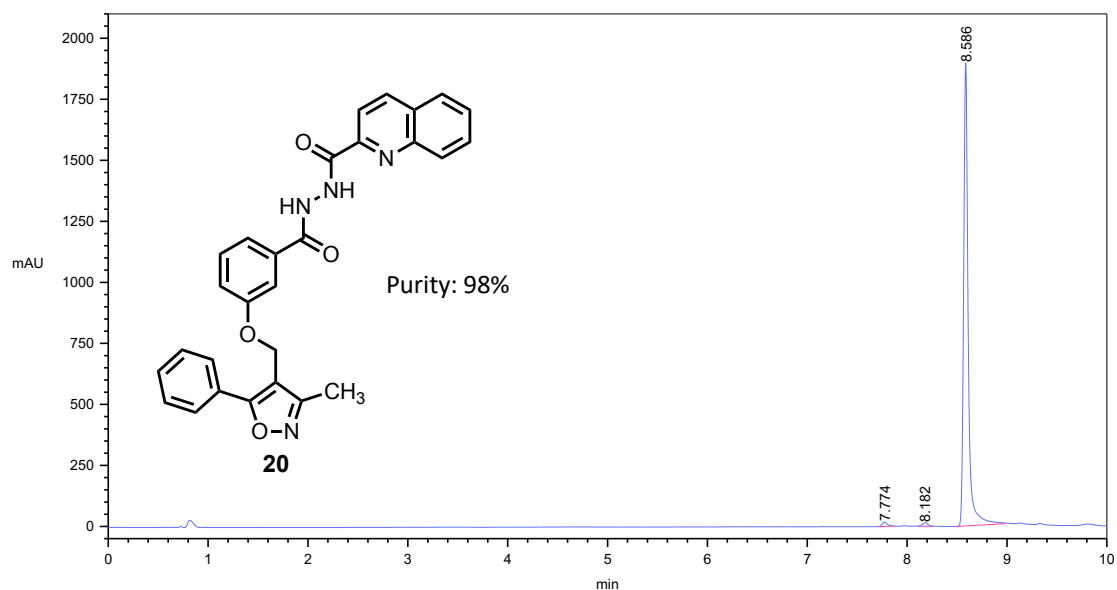

| Peak | RetTime (min) | Area (mAU*s) | Height (mAU) | Area (%) |
|------|---------------|--------------|--------------|----------|
| 1    | 7.774         | 68.82444     | 19.65042     | 1.1907   |
| 2    | 8.182         | 36.59236     | 12.5091      | 0.6331   |
| 3    | 8.586         | 5674.78396   | 1884.62500   | 98.1762  |

21

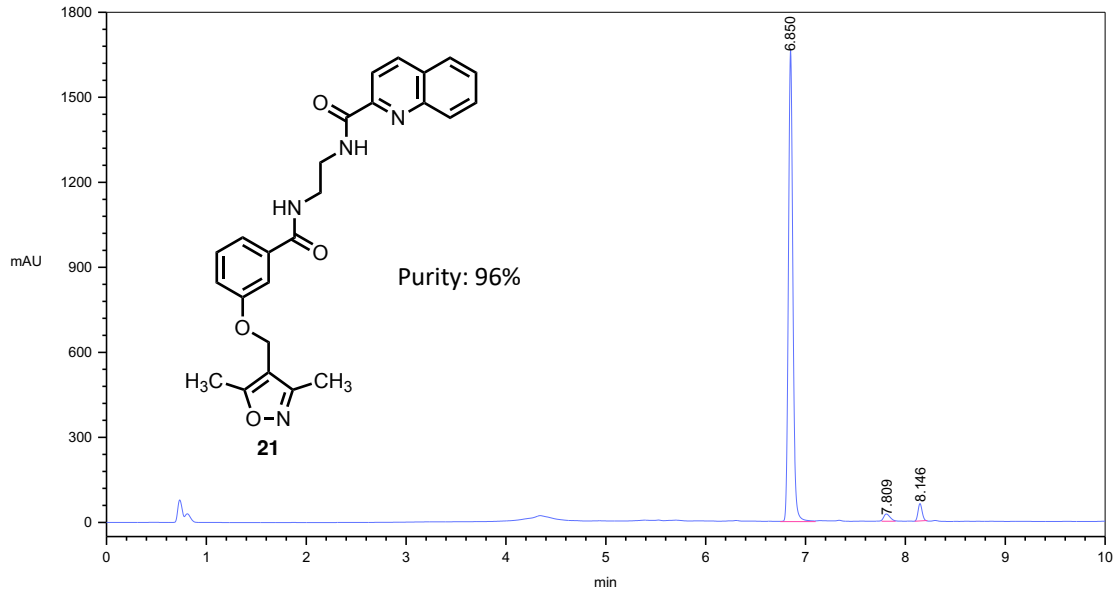

| Peak | RetTime (min) | Area (mAU*s) | Height (mAU) | Area (%) |
|------|---------------|--------------|--------------|----------|
| 1    | 6.850         | 5141.86963   | 1663.25903   | 95.7817  |
| 2    | 7.809         | 103.18970    | 24.77596     | 1.9222   |
| 3    | 8.146         | 123.25990    | 52.21564     | 2.2961   |

22

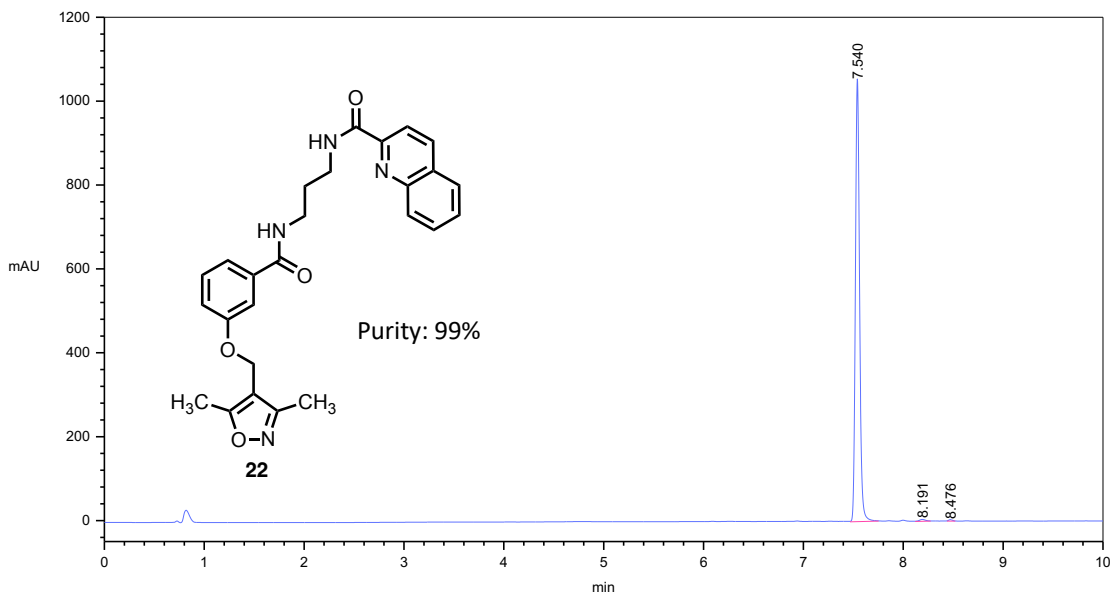

| Peak | RetTime (min) | Area (mAU*s) | Height (mAU) | Area (%) |
|------|---------------|--------------|--------------|----------|
| 1    | 7.540         | 3082.96973   | 1058.75903   | 99.0332  |
| 2    | 8.191         | 21.18954     | 5.18325      | 0.6807   |
| 3    | 8.476         | 8.90759      | 3.50440      | 0.2861   |

23

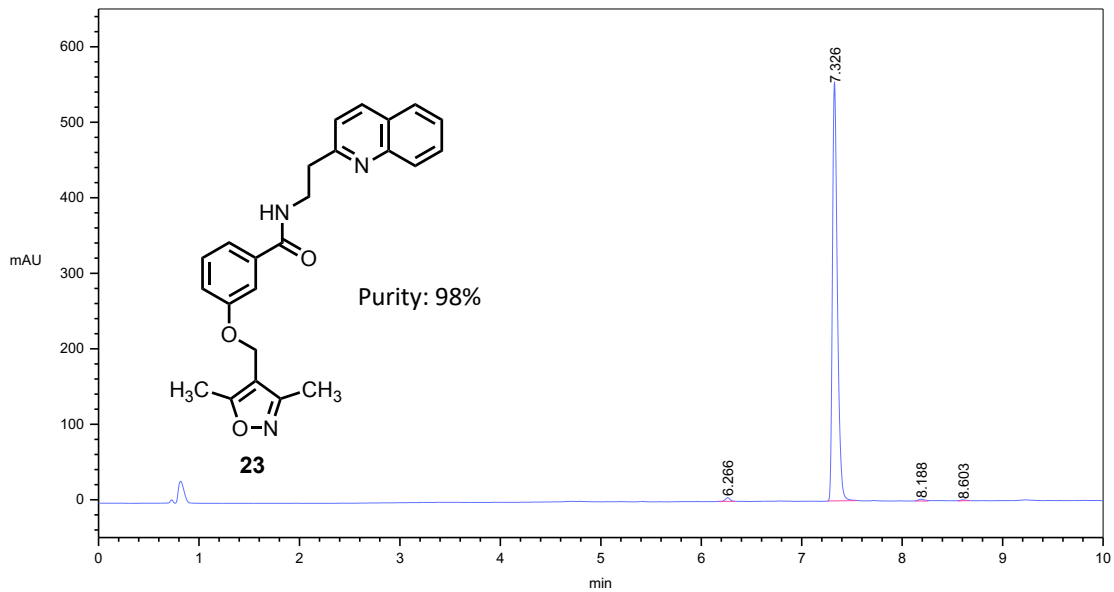

| Peak | RetTime (min) | Area (mAU*s) | Height (mAU) | Area (%) |
|------|---------------|--------------|--------------|----------|
| 1    | 6.266         | 12.41452     | 4.17340      | 0.6486   |
| 2    | 7.326         | 1871.71509   | 554.90857    | 97.7936  |
| 3    | 8.188         | 23.82956     | 4.61825      | 1.2451   |
| 4    | 8.603         | 5.98485      | 1.58921      | 0.3127   |

24

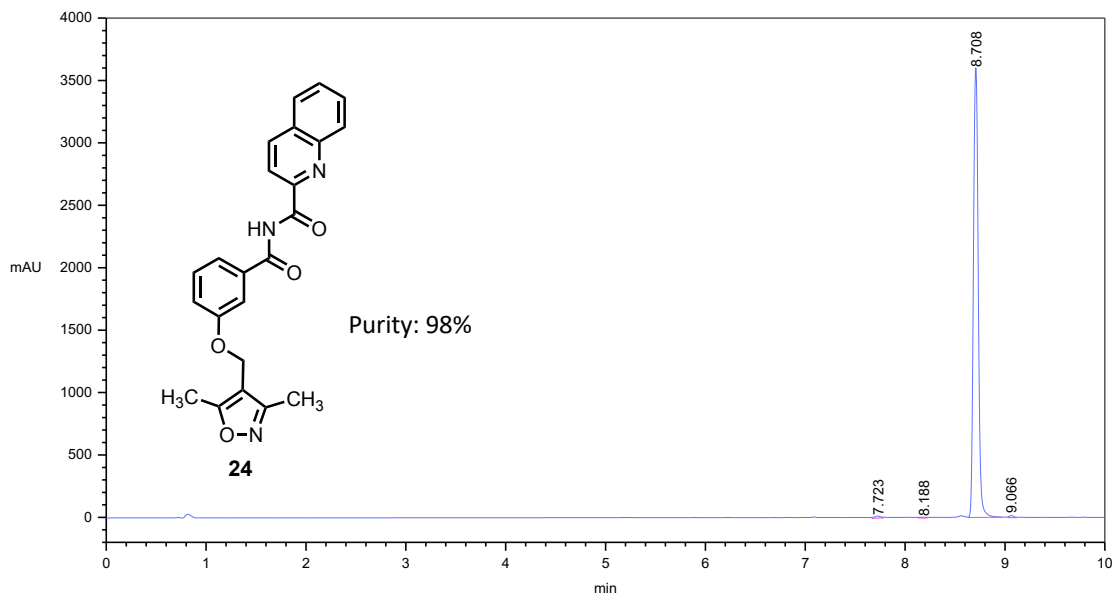

| Peak | RetTime (min) | Area (mAU*s) | Height (mAU) | Area (%) |
|------|---------------|--------------|--------------|----------|
| 1    | 7.723         | 81.48239     | 18.74687     | 0.6777   |
| 2    | 8.188         | 58.59719     | 27.54438     | 0.4874   |
| 3    | 8.708         | 1.18029e4    | 3591.81396   | 98.1718  |
| 4    | 9.066         | 79.71532     | 20.06610     | 0.6630   |

25

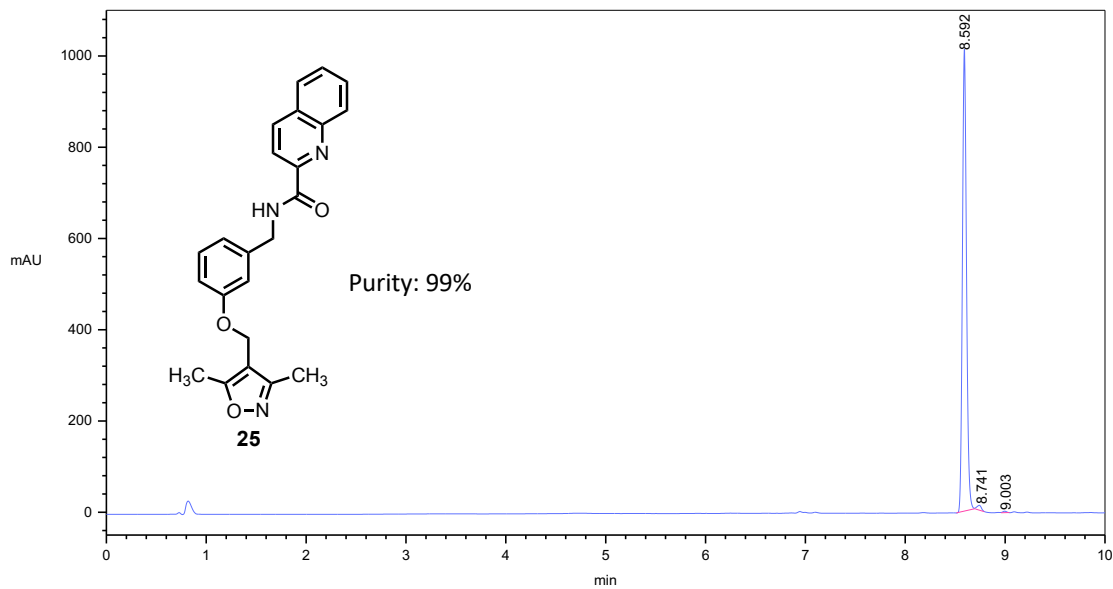

26

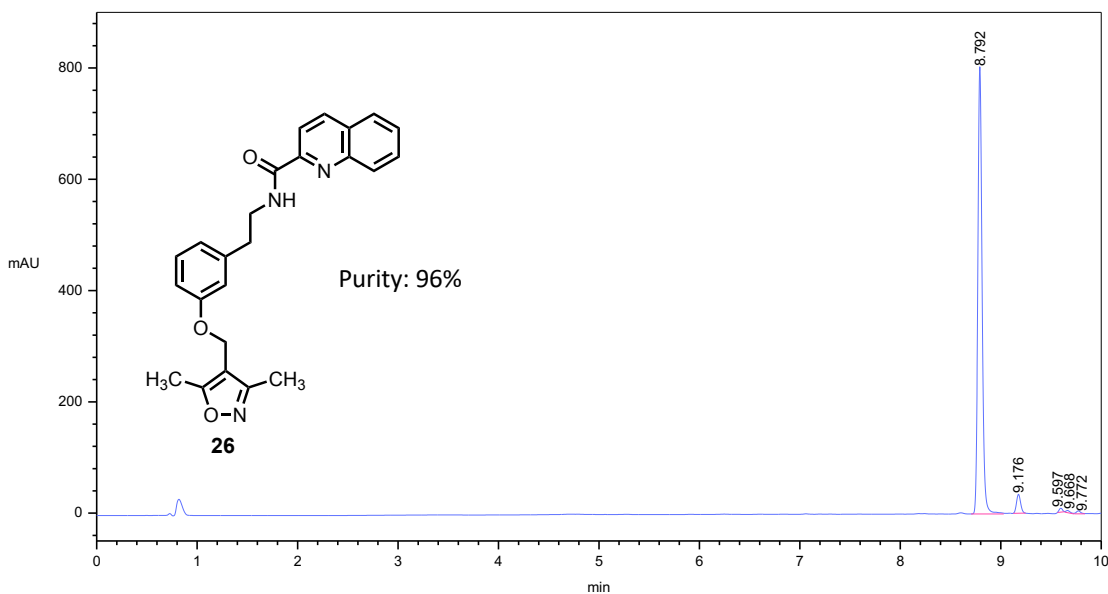

Supplement: NIHMS1985593-supplement-SI.pdf [file NIHMS1985593-supplement-SI.pdf]
